# Supplementary material for: Prognostic Significance and Gene Co-Expression Network of PLAU and PLAUR in Gliomas
Source: Front Oncol. 2022 Jan 11;11:602321. doi: 10.3389/fonc.2021.602321 (PMC8787124; doi:10.3389/fonc.2021.602321)
Supplement: Supplementary Table 3 — Co-expression genes of PLAU(LinkedOmics). [file Table_3.xlsx]

## Sheet: Sheet1
Query	Statistic	P-value	FDR (BH)	Event_SD	Event_TD
PLAU	1	1e-193	1e-189	669	669
C10orf55	0.855858	3.74163e-193	3.7637e-189	669	641
SERPINH1	0.842842	1.20783e-181	8.09971e-178	669	669
TNFRSF12A	0.84103	3.99227e-180	2.00791e-176	669	669
PLAUR	0.838611	3.97412e-178	1.59903e-174	669	669
CLIC1	0.836346	2.75667e-176	9.24311e-173	669	669
IFI30	0.833664	3.8417e-174	1.1041e-170	669	669
S100A11	0.831068	4.20092e-172	1.05643e-168	669	669
CASP4	0.82952	6.65974e-171	1.48867e-167	669	669
LIF	0.828915	1.94218e-170	3.90727e-167	669	668
ANXA2P2	0.828451	4.41113e-170	8.06756e-167	669	669
IFNGR2	0.82832	5.55723e-170	9.12762e-167	669	669
ANXA2	0.828286	5.89815e-170	9.12762e-167	669	669
SRPX2	0.822872	6.92437e-166	9.95032e-163	669	668
CLCF1	0.822401	1.53956e-165	2.06486e-162	669	669
VASP	0.817787	3.44798e-162	4.33541e-159	669	669
ITGA5	0.815191	2.40498e-160	2.84608e-157	669	669
TREM1	0.811408	1.03713e-157	1.15917e-154	669	632
TPM4	0.809105	3.89259e-156	4.12164e-153	669	669
CD276	0.803691	1.62065e-152	1.63021e-149	669	669
GLT25D1	0.801298	5.94245e-151	5.69287e-148	669	669
MSR1	0.800163	3.2232e-150	2.94747e-147	669	669
BCL3	0.799092	1.57177e-149	1.37482e-146	669	669
C1R	0.798885	2.13352e-149	1.78842e-146	669	669
FAM20C	0.797402	1.88205e-148	1.51453e-145	669	669
ABCC3	0.795799	1.94127e-147	1.5021e-144	669	667
SLC39A1	0.793883	3.06679e-146	2.2851e-143	669	669
S100A4	0.793819	3.36137e-146	2.41515e-143	669	669
FSTL1	0.79296	1.14821e-145	7.96539e-143	669	669
RUNX1	0.791551	8.49606e-145	5.69746e-142	669	669
SERPINB8	0.791128	1.54496e-144	1.00263e-141	669	669
PYGL	0.790861	2.25132e-144	1.41538e-141	669	669
COL4A1	0.789748	1.07613e-143	6.5605e-141	669	669
GPR65	0.788768	4.23068e-143	2.50332e-140	669	669
ANXA1	0.785873	2.31778e-141	1.33226e-138	669	669
FCGR2A	0.785353	4.72359e-141	2.6397e-138	669	669
ITGB1	0.784574	1.36901e-140	7.4437e-138	669	669
MYO1G	0.784343	1.87574e-140	9.93059e-138	669	669
SPOCD1	0.783197	8.87192e-140	4.57655e-137	669	669
SLC16A3	0.782889	1.34661e-139	6.77276e-137	669	669
ANXA2P1	0.782582	2.03749e-139	9.9976e-137	669	667
COL4A2	0.781792	5.89746e-139	2.82488e-136	669	669
FCGR2C	0.781328	1.09846e-138	5.13927e-136	669	666
C1RL	0.780654	2.70422e-138	1.23644e-135	669	669
TNFAIP8	0.780205	4.91851e-138	2.1989e-135	669	669
TIMP1	0.779516	1.22787e-137	5.37006e-135	669	669
VIM	0.779214	1.83227e-137	7.8429e-135	669	669
PTX3	0.778969	2.53479e-137	1.0624e-134	669	669
SOCS3	0.778235	6.68344e-137	2.74403e-134	669	669
DPYD	0.778009	8.99387e-137	3.61877e-134	669	669
RBMS1	0.777765	1.23952e-136	4.88956e-134	669	669
RDH10	0.77772	1.31582e-136	5.09072e-134	669	669
PTPN22	0.777155	2.7627e-136	1.04868e-133	669	653
IKBIP	0.776008	1.23517e-135	4.60168e-133	669	669
PTPN7	0.774489	8.86398e-135	3.24228e-132	669	669
FCGR3A	0.774142	1.38797e-134	4.98628e-132	669	669
PLEK2	0.774028	1.60816e-134	5.67597e-132	669	648
ICAM1	0.773109	5.24363e-134	1.81882e-131	669	669
FNDC3B	0.772966	6.29461e-134	2.14635e-131	669	669
LOC541471	0.772926	6.62944e-134	2.22285e-131	669	669
TNFRSF1A	0.772896	6.8829e-134	2.27e-131	669	669
CTSC	0.772813	7.6609e-134	2.48584e-131	669	669
FAM20A	0.771812	2.75348e-133	8.79277e-131	669	668
RAC2	0.771347	4.97343e-133	1.56337e-130	669	669
CISH	0.770941	8.32732e-133	2.57737e-130	669	669
CCDC109B	0.770657	1.19438e-132	3.64069e-130	669	669
EDEM2	0.770459	1.53424e-132	4.60683e-130	669	669
FAM129A	0.770328	1.81145e-132	5.35923e-130	669	669
CD93	0.77027	1.94852e-132	5.68122e-130	669	669
KYNU	0.769922	3.02413e-132	8.69135e-130	669	668
ITGB3	0.76959	4.60168e-132	1.3039e-129	669	669
COL1A1	0.769312	6.52914e-132	1.82435e-129	669	669
IGFBP7	0.769243	7.11749e-132	1.9615e-129	669	669
ZYX	0.767731	4.73441e-131	1.28712e-128	669	669
EMR2	0.767667	5.13174e-131	1.37654e-128	669	669
CHI3L2	0.767086	1.05878e-130	2.80271e-128	669	669
PLSCR1	0.767046	1.11251e-130	2.90668e-128	669	669
SERPINA1	0.766753	1.60024e-130	4.12739e-128	669	669
LAMC1	0.766682	1.74805e-130	4.45155e-128	669	669
IL10RB	0.766265	2.9348e-130	7.38029e-128	669	669
CSTA	0.766009	4.02836e-130	1.00053e-127	669	637
SYDE1	0.765777	5.3678e-130	1.31694e-127	669	669
CFI	0.765569	6.93778e-130	1.68162e-127	669	669
PLK3	0.76554	7.19321e-130	1.72277e-127	669	669
TYMP	0.764533	2.48773e-129	5.88801e-127	669	669
ADAM12	0.764494	2.60843e-129	6.1019e-127	669	669
MMP14	0.763106	1.42609e-128	3.26024e-126	669	669
CSDA	0.76243	3.25028e-128	7.34709e-126	669	669
NAMPT	0.762376	3.47049e-128	7.75771e-126	669	669
COL6A2	0.761808	6.91895e-128	1.52962e-125	669	669
ENG	0.76167	8.17684e-128	1.78806e-125	669	669
MBD2	0.76068	2.70316e-127	5.84754e-125	669	669
PLBD1	0.760482	3.43034e-127	7.34166e-125	669	669
RAB42	0.760178	4.94615e-127	1.04744e-124	669	669
IRF1	0.760154	5.09504e-127	1.05919e-124	669	669
TAGLN2	0.759804	7.75386e-127	1.59176e-124	669	669
HK3	0.759511	1.10157e-126	2.21897e-124	669	669
KIAA0040	0.75951	1.10298e-126	2.21897e-124	669	669
TGIF1	0.758971	2.10342e-126	4.14868e-124	669	669
COL3A1	0.758675	2.99374e-126	5.84738e-124	669	669
TUBB6	0.758363	4.34689e-126	8.40872e-124	669	669
PDPN	0.757908	7.46639e-126	1.43056e-123	669	669
TUBA1C	0.757587	1.09423e-125	2.07677e-123	669	669
LY96	0.757344	1.45874e-125	2.7427e-123	669	669
EMR1	0.756872	2.55181e-125	4.75345e-123	669	638
MYL12A	0.756391	4.50636e-125	8.31733e-123	669	669
CD248	0.756275	5.17061e-125	9.45658e-123	669	669
CASP8	0.756019	6.9928e-125	1.2674e-122	669	669
NCRNA00152	0.755807	8.97187e-125	1.61157e-122	669	669
RAB32	0.755328	1.57563e-124	2.80518e-122	669	669
LOXL2	0.754498	4.16633e-124	7.35247e-122	669	669
FCER1G	0.754124	6.45081e-124	1.1285e-121	669	669
HSD3B7	0.753768	9.77871e-124	1.69593e-121	669	669
ADPGK	0.753061	2.22601e-123	3.82759e-121	669	669
PFN1	0.752653	3.57082e-123	6.08795e-121	669	669
TES	0.752416	4.70207e-123	7.94926e-121	669	669
ADPRH	0.751906	8.48256e-123	1.4221e-120	669	669
TMSL3	0.751731	1.03802e-122	1.72586e-120	669	669
DOK3	0.751463	1.41467e-122	2.31384e-120	669	669
ARPC5	0.751302	1.70214e-122	2.76158e-120	669	669
MAP2K3	0.751165	1.99363e-122	3.20862e-120	669	669
FCGBP	0.751006	2.39449e-122	3.82321e-120	669	669
FAM70B	0.750867	2.80831e-122	4.44862e-120	669	669
DENND2D	0.750844	2.88281e-122	4.53097e-120	669	668
HLA-DRA	0.750414	4.72425e-122	7.36764e-120	669	669
FN1	0.750203	6.01484e-122	9.3082e-120	669	669
OSTC	0.74994	8.12915e-122	1.24841e-119	669	669
KDELR2	0.74992	8.32406e-122	1.26866e-119	669	669
BACE2	0.749877	8.74058e-122	1.32213e-119	669	669
GLA	0.749782	9.74639e-122	1.46327e-119	669	669
APOBEC3C	0.749527	1.30347e-121	1.94245e-119	669	669
MSN	0.749245	1.79827e-121	2.66011e-119	669	669
KDELR3	0.747966	7.70076e-121	1.13083e-118	669	669
BCL2L12	0.747383	1.49089e-120	2.17346e-118	669	669
HMOX1	0.74675	3.04567e-120	4.40811e-118	669	669
CMTM6	0.746727	3.12573e-120	4.49167e-118	669	669
RIPK1	0.746674	3.32024e-120	4.73735e-118	669	669
GPRC5A	0.746623	3.5131e-120	4.97722e-118	669	665
CAPZA1	0.745816	8.70657e-120	1.21638e-117	669	669
LEPRE1	0.745258	1.6278e-119	2.25849e-117	669	669
PLP2	0.745105	1.93118e-119	2.66106e-117	669	669
FOSL1	0.744933	2.34035e-119	3.20294e-117	669	669
HEXB	0.744782	2.77032e-119	3.76577e-117	669	669
ACTN1	0.743902	7.38849e-119	9.97595e-117	669	669
S100A6	0.743795	8.32791e-119	1.11694e-116	669	669
ERI1	0.743592	1.04364e-118	1.39046e-116	669	669
PRSS23	0.743211	1.59156e-118	2.10652e-116	669	669
EHD4	0.742074	5.59779e-118	7.3193e-116	669	669
ST8SIA4	0.742073	5.6028e-118	7.3193e-116	669	669
SQRDL	0.741447	1.11655e-117	1.44921e-115	669	669
RAB27A	0.741063	1.70367e-117	2.19708e-115	669	669
PDIA4	0.740426	3.42491e-117	4.34524e-115	669	669
B2M	0.740423	3.4342e-117	4.34524e-115	669	669
BATF	0.739971	5.63249e-117	7.08215e-115	669	665
UPP1	0.739859	6.36254e-117	7.9504e-115	669	669
IBSP	0.739767	7.03727e-117	8.73925e-115	669	490
MS4A6A	0.739647	8.01538e-117	9.89285e-115	669	669
CHI3L1	0.73888	1.84884e-116	2.25423e-114	669	669
DDOST	0.738717	2.20672e-116	2.67438e-114	669	669
FCGR2B	0.738506	2.77402e-116	3.34178e-114	669	668
CASP1	0.738328	3.36343e-116	4.02771e-114	669	669
EMILIN2	0.73821	3.82389e-116	4.55201e-114	669	669
MIR155HG	0.737843	5.6858e-116	6.72865e-114	669	665
TXNDC5	0.737665	6.89725e-116	8.11456e-114	669	669
ELF4	0.73718	1.16331e-115	1.36067e-113	669	669
CASP6	0.73711	1.25534e-115	1.45982e-113	669	669
KDELR1	0.736651	2.05697e-115	2.37829e-113	669	669
HLA-DMB	0.736619	2.13007e-115	2.44873e-113	669	669
PCOLCE	0.735925	4.48653e-115	5.12841e-113	669	669
NNMT	0.735873	4.74448e-115	5.39263e-113	669	669
CALU	0.735854	4.84099e-115	5.47141e-113	669	669
PLA2G2A	0.735486	7.18356e-115	8.07368e-113	669	389
ACTB	0.735148	1.03036e-114	1.14523e-112	669	669
FBLIM1	0.735136	1.04445e-114	1.15452e-112	669	669
SERPINA3	0.735038	1.15876e-114	1.27388e-112	669	669
CLEC5A	0.734346	2.42416e-114	2.63618e-112	669	651
EMP3	0.734238	2.71966e-114	2.94162e-112	669	669
PTGER4	0.734085	3.20144e-114	3.4442e-112	669	669
TEAD4	0.733974	3.59894e-114	3.83087e-112	669	669
PI4K2B	0.733561	5.58216e-114	5.91063e-112	669	669
SH2D2A	0.733014	9.96911e-114	1.04458e-111	669	658
CD63	0.732849	1.18616e-113	1.23644e-111	669	669
NAGA	0.732728	1.34772e-113	1.3976e-111	669	669
CARD16	0.732265	2.1969e-113	2.26653e-111	669	669
PDLIM1	0.731972	2.99292e-113	3.06447e-111	669	669
METTL7B	0.73197	3.0008e-113	3.06447e-111	669	669
ARHGDIB	0.731939	3.10022e-113	3.15001e-111	669	669
HSPA7	0.731312	5.99417e-113	6.05983e-111	669	668
ETV6	0.731007	8.24804e-113	8.29671e-111	669	669
COL1A2	0.730985	8.44005e-113	8.44761e-111	669	669
HLA-DMA	0.730956	8.70047e-113	8.66515e-111	669	669
GLB1	0.730894	9.2871e-113	9.20384e-111	669	669
ZBTB42	0.730708	1.1283e-112	1.1127e-110	669	669
COL5A1	0.73068	1.16164e-112	1.13999e-110	669	669
SLC30A7	0.730546	1.33718e-112	1.3059e-110	669	669
MRC2	0.730053	2.2398e-112	2.17683e-110	669	669
PDLIM7	0.729762	3.03129e-112	2.91787e-110	669	669
SECTM1	0.729606	3.567e-112	3.41719e-110	669	669
TMEM71	0.729232	5.26635e-112	5.02126e-110	669	669
TRAM1	0.729111	5.97266e-112	5.66783e-110	669	669
SERPINE1	0.72858	1.03692e-111	9.74799e-110	669	669
EXOC3L2	0.727849	2.20891e-111	2.06692e-109	669	638
WDR1	0.727758	2.42894e-111	2.26229e-109	669	669
CD14	0.727557	2.98849e-111	2.77062e-109	669	669
FAM115C	0.727494	3.19013e-111	2.944e-109	669	669
GBP5	0.727455	3.3197e-111	3.04958e-109	669	669
LUM	0.727301	3.89192e-111	3.55899e-109	669	669
SEC24D	0.727007	5.26683e-111	4.77288e-109	669	669
GBP1	0.726838	6.26876e-111	5.65538e-109	669	669
C9orf21	0.726814	6.42733e-111	5.77255e-109	669	669
GPX8	0.726656	7.56261e-111	6.76198e-109	669	669
KCNE3	0.726509	8.79303e-111	7.82735e-109	669	669
ANG	0.726417	9.66961e-111	8.56975e-109	669	668
ACTR3	0.726324	1.06296e-110	9.37142e-109	669	669
NPC2	0.726113	1.32082e-110	1.15032e-108	669	669
VAMP8	0.725537	2.38165e-110	2.06526e-108	669	669
C1S	0.725495	2.48661e-110	2.14702e-108	669	669
CHRNA9	0.724859	4.76482e-110	4.07909e-108	669	609
CTSA	0.724719	5.49347e-110	4.68295e-108	669	669
CNN3	0.724608	6.14955e-110	5.22011e-108	669	669
ARPC1B	0.724329	8.17306e-110	6.90864e-108	669	669
CD74	0.724257	8.79566e-110	7.40381e-108	669	669
TGFB1I1	0.72413	1.00057e-109	8.35244e-108	669	669
TPST1	0.723786	1.41898e-109	1.17963e-107	669	669
TMEM49	0.723669	1.59775e-109	1.32278e-107	669	669
CD58	0.723641	1.64409e-109	1.35557e-107	669	669
OLFML3	0.723125	2.77379e-109	2.26842e-107	669	669
REXO2	0.722882	3.54932e-109	2.8909e-107	669	669
C5orf62	0.722686	4.32654e-109	3.50973e-107	669	669
P4HB	0.722662	4.4301e-109	3.57931e-107	669	669
PDIA5	0.722576	4.8343e-109	3.87584e-107	669	669
FHOD1	0.722576	4.83565e-109	3.87584e-107	669	669
AIM1	0.722325	6.2299e-109	4.97353e-107	669	669
RELB	0.722319	6.2641e-109	4.98107e-107	669	669
SH2B3	0.722275	6.55025e-109	5.18811e-107	669	669
EMILIN1	0.722222	6.90613e-109	5.44853e-107	669	669
SIGLEC9	0.722196	7.09392e-109	5.56193e-107	669	669
FAM176B	0.722194	7.10516e-109	5.56193e-107	669	669
RPN2	0.722071	8.04491e-109	6.27316e-107	669	669
PIGT	0.721463	1.48289e-108	1.14742e-106	669	669
SLC10A3	0.720596	3.54005e-108	2.72869e-106	669	669
GNG5	0.720243	5.03617e-108	3.85238e-106	669	669
FHL3	0.720049	6.11388e-108	4.64148e-106	669	669
SHC1	0.719972	6.60454e-108	4.99512e-106	669	669
FAM109B	0.719941	6.81344e-108	5.13381e-106	669	669
CCR5	0.719802	7.82355e-108	5.87291e-106	669	669
CLIC4	0.719732	8.39286e-108	6.27686e-106	669	669
SP100	0.719684	8.80199e-108	6.55846e-106	669	669
PPP1R3B	0.719183	1.45028e-107	1.07268e-105	669	669
TMEM154	0.719167	1.47362e-107	1.08595e-105	669	669
AK2	0.719161	1.48276e-107	1.08869e-105	669	669
REEP4	0.719037	1.67605e-107	1.22614e-105	669	669
RNASE2	0.718743	2.24609e-107	1.6372e-105	669	668
HLA-DPA1	0.718525	2.78869e-107	2.02537e-105	669	669
MYOF	0.717943	4.96537e-107	3.58041e-105	669	669
LPAR6	0.717592	7.02293e-107	5.02802e-105	669	669
CCL2	0.717507	7.63593e-107	5.4475e-105	669	669
CTSB	0.717289	9.47235e-107	6.73373e-105	669	669
TRIM38	0.717238	9.96008e-107	7.05553e-105	669	669
C2	0.717209	1.02547e-106	7.23875e-105	669	669
PLOD1	0.716734	1.63723e-106	1.15167e-104	669	669
TNFRSF11B	0.716694	1.70287e-106	1.18953e-104	669	668
GRN	0.716689	1.71071e-106	1.19087e-104	669	669
PTGIR	0.716329	2.43792e-106	1.69124e-104	669	667
RBM47	0.716323	2.45229e-106	1.69536e-104	669	669
ZFP36L2	0.716143	2.92812e-106	2.0174e-104	669	669
IQGAP1	0.71598	3.4335e-106	2.35751e-104	669	669
STK40	0.715678	4.61695e-106	3.15931e-104	669	669
MYCBP	0.715667	4.67076e-106	3.1853e-104	669	669
BST1	0.715334	6.4686e-106	4.38166e-104	669	669
GUSB	0.715259	6.9617e-106	4.69985e-104	669	669
C5AR1	0.715174	7.56573e-106	5.09055e-104	669	669
STC1	0.714874	1.01461e-105	6.78139e-104	669	667
HSPA6	0.714727	1.17052e-105	7.79754e-104	669	669
GAL3ST4	0.714021	2.32851e-105	1.54095e-103	669	669
GPR84	0.713726	3.10248e-105	2.03308e-103	669	665
LOX	0.713634	3.39382e-105	2.21678e-103	669	669
CD44	0.713374	4.36651e-105	2.84289e-103	669	669
CSDAP1	0.713305	4.66769e-105	3.02918e-103	669	669
CALR	0.713028	6.1096e-105	3.95218e-103	669	669
CD151	0.713016	6.18007e-105	3.98495e-103	669	669
PQLC3	0.712911	6.83863e-105	4.39551e-103	669	669
SOD2	0.712831	7.38949e-105	4.73445e-103	669	669
ITPRIPL2	0.712808	7.5588e-105	4.82755e-103	669	669
LSP1	0.712198	1.3628e-104	8.67619e-103	669	669
TMEM37	0.712163	1.41021e-104	8.94973e-103	669	669
LOC154761	0.712125	1.46244e-104	9.25198e-103	669	669
STEAP3	0.711832	1.93932e-104	1.22305e-102	669	669
RNF135	0.711443	2.8224e-104	1.77441e-102	669	669
BCL10	0.711402	2.93505e-104	1.83948e-102	669	669
MMP9	0.710746	5.51089e-104	3.44311e-102	669	652
TMED9	0.710525	6.81208e-104	4.24289e-102	669	669
SP140L	0.70982	1.33794e-103	8.25663e-102	669	669
PLEKHA4	0.709032	2.83737e-103	1.74563e-101	669	669
CTSZ	0.708968	3.01631e-103	1.85006e-101	669	669
BCL2A1	0.708861	3.33973e-103	2.04221e-101	669	668
APOBEC3G	0.708672	3.99623e-103	2.43625e-101	669	669
HSPA5	0.708534	4.55971e-103	2.77137e-101	669	669
FADD	0.708524	4.6011e-103	2.7881e-101	669	669
PDIA3P	0.708036	7.31061e-103	4.41666e-101	669	669
STAT3	0.707698	1.00774e-102	6.05184e-101	669	669
GLIPR1	0.707626	1.07836e-102	6.45669e-101	669	669
NUAK2	0.707444	1.28139e-102	7.64954e-101	669	669
NEK6	0.707395	1.34192e-102	7.98721e-101	669	669
ADAM9	0.707268	1.51342e-102	8.95502e-101	669	669
SERPING1	0.707122	1.73666e-102	1.02458e-100	669	669
GDF15	0.706772	2.41622e-102	1.41719e-100	669	668
ARID5A	0.706724	2.52845e-102	1.4787e-100	669	669
DAP	0.706676	2.64542e-102	1.54262e-100	669	669
S100A3	0.706615	2.80319e-102	1.6252e-100	669	659
FLNA	0.70615	4.34373e-102	2.51112e-100	669	669
CXCL10	0.706017	4.92187e-102	2.8372e-100	669	665
GBP2	0.705715	6.53785e-102	3.75795e-100	669	669
HSPG2	0.705459	8.31688e-102	4.76692e-100	669	669
RGS19	0.705373	9.01548e-102	5.15266e-100	669	669
FAM46A	0.7051	1.1636e-101	6.61283e-100	669	669
SIGLEC7	0.705058	1.21026e-101	6.85857e-100	669	668
TRPM8	0.70451	2.0213e-101	1.14226e-99	669	634
ANXA5	0.704089	2.99378e-101	1.68708e-99	669	669
PVRL2	0.703737	4.15624e-101	2.33562e-99	669	669
ALOX5AP	0.703699	4.30592e-101	2.41299e-99	669	669
TMEM214	0.703569	4.86341e-101	2.70539e-99	669	669
LTF	0.703567	4.86804e-101	2.70539e-99	669	667
TM4SF1	0.703558	4.91196e-101	2.72228e-99	669	669
C1orf85	0.703307	6.20363e-101	3.4287e-99	669	669
ARPC2	0.702961	8.55684e-101	4.71634e-99	669	669
CALD1	0.702866	9.34098e-101	5.13447e-99	669	669
CD163	0.701609	2.99019e-100	1.63915e-98	669	669
PTPN2	0.701479	3.37005e-100	1.84235e-98	669	669
SERTAD1	0.701101	4.77861e-100	2.59127e-98	669	669
LTBR	0.700878	5.86458e-100	3.1716e-98	669	669
PDIA6	0.700864	5.94074e-100	3.20418e-98	669	669
CD300LB	0.700684	7.00936e-100	3.77044e-98	669	649
GPX7	0.700633	7.35115e-100	3.94374e-98	669	669
SAT1	0.70005	1.25466e-99	6.69529e-98	669	669
POSTN	0.699941	1.38642e-99	7.37013e-98	669	622
CTSS	0.69994	1.38845e-99	7.37013e-98	669	669
LYZ	0.699826	1.54126e-99	8.15973e-98	669	669
LOC151534	0.699646	1.81804e-99	9.59982e-98	669	669
HLA-B	0.699449	2.17612e-99	1.14605e-97	669	669
IGFBP2	0.699272	2.55987e-99	1.34464e-97	669	669
NRP1	0.698896	3.60817e-99	1.89034e-97	669	669
CDCP1	0.698889	3.63135e-99	1.89755e-97	669	669
ST14	0.698885	3.64361e-99	1.89902e-97	669	669
GMFG	0.698858	3.73509e-99	1.94167e-97	669	669
HAMP	0.698744	4.14595e-99	2.14969e-97	669	659
IL2RB	0.698299	6.21903e-99	3.20806e-97	669	667
C21orf7	0.697704	1.06747e-98	5.47839e-97	669	669
CDK2	0.697465	1.32709e-98	6.79347e-97	669	669
FAM114A1	0.697451	1.34314e-98	6.85818e-97	669	669
RAB38	0.696904	2.20594e-98	1.12352e-96	669	667
PARP9	0.696608	2.88254e-98	1.46442e-96	669	669
ZCCHC9	0.695838	5.77472e-98	2.92634e-96	669	669
SLC11A1	0.695737	6.32837e-98	3.19885e-96	669	669
HLA-DRB1	0.695718	6.43872e-98	3.24647e-96	669	669
RHOC	0.695571	7.34471e-98	3.68481e-96	669	669
TM9SF1	0.695427	8.36091e-98	4.1842e-96	669	669
SLC43A3	0.695334	9.09362e-98	4.53959e-96	669	669
TGFBI	0.695321	9.20071e-98	4.57037e-96	669	669
SERPINA5	0.695187	1.03759e-97	5.14145e-96	669	651
SRPR	0.694815	1.44947e-97	7.16473e-96	669	669
VKORC1	0.694694	1.61563e-97	7.96646e-96	669	669
GALNT5	0.694051	2.87534e-97	1.40745e-95	669	420
C1QB	0.693942	3.1702e-97	1.54801e-95	669	669
C8orf4	0.693707	3.90936e-97	1.90432e-95	669	669
CIITA	0.693675	4.02353e-97	1.9552e-95	669	669
MYO1C	0.69364	4.15014e-97	2.01187e-95	669	669
IL10	0.693527	4.58984e-97	2.21967e-95	669	656
SLAMF8	0.693445	4.941e-97	2.38376e-95	669	669
ORMDL2	0.693127	6.56057e-97	3.15001e-95	669	669
SCPEP1	0.693046	7.05167e-97	3.37775e-95	669	669
SLC7A7	0.692638	1.01367e-96	4.84396e-95	669	669
XBP1	0.692533	1.11266e-96	5.30438e-95	669	669
SHISA5	0.692427	1.22253e-96	5.81438e-95	669	669
HLA-DPB1	0.692314	1.35204e-96	6.40006e-95	669	669
ESM1	0.692262	1.41623e-96	6.67255e-95	669	647
C15orf48	0.692009	1.77284e-96	8.33317e-95	669	635
MACC1	0.691863	2.01687e-96	9.45812e-95	669	642
GALNT2	0.691836	2.06572e-96	9.66469e-95	669	669
DDB2	0.691703	2.32614e-96	1.08327e-94	669	669
ITK	0.691615	2.51432e-96	1.16551e-94	669	652
CD300A	0.691568	2.62161e-96	1.21245e-94	669	669
TMEM8A	0.69152	2.73318e-96	1.26115e-94	669	669
NMI	0.69137	3.12196e-96	1.43724e-94	669	669
MTMR11	0.691239	3.50637e-96	1.60321e-94	669	669
ISG20	0.691209	3.59999e-96	1.64228e-94	669	669
GNG12	0.691206	3.60839e-96	1.64239e-94	669	669
PDCD1LG2	0.690305	7.99449e-96	3.61423e-94	669	668
BDKRB2	0.689845	1.19865e-95	5.38267e-94	669	666
CCRL2	0.689811	1.23507e-95	5.53388e-94	669	669
SERPINB1	0.689766	1.28462e-95	5.74311e-94	669	669
GADD45A	0.689715	1.34335e-95	5.99235e-94	669	669
MGAT2	0.689688	1.37631e-95	6.11228e-94	669	669
C17orf87	0.689623	1.45636e-95	6.45352e-94	669	669
IL2RA	0.689466	1.67207e-95	7.39312e-94	669	494
CKLF	0.68911	2.28584e-95	1.00848e-93	669	669
ADAMTSL4	0.688703	3.264e-95	1.43374e-93	669	669
FBP1	0.688438	4.11788e-95	1.80095e-93	669	669
LRRN4CL	0.688097	5.54461e-95	2.41443e-93	669	669
MYL6	0.687947	6.31867e-95	2.74555e-93	669	669
ZNF436	0.687622	8.39494e-95	3.63986e-93	669	669
CMTM3	0.687604	8.52764e-95	3.68944e-93	669	669
TNC	0.687553	8.9111e-95	3.84707e-93	669	669
TCIRG1	0.687334	1.07827e-94	4.64508e-93	669	669
CD48	0.686916	1.55115e-94	6.66796e-93	669	665
RCAN1	0.686538	2.15395e-94	9.21983e-93	669	669
PLAT	0.686534	2.16085e-94	9.22972e-93	669	669
CLEC2B	0.68644	2.3443e-94	9.99209e-93	669	669
SPP1	0.686275	2.70511e-94	1.15056e-92	669	669
RUNX3	0.686232	2.80801e-94	1.19181e-92	669	669
TREML3	0.686127	3.07577e-94	1.29997e-92	669	449
RAP1B	0.686068	3.23767e-94	1.36552e-92	669	669
LRRC25	0.685872	3.83593e-94	1.60774e-92	669	669
PECAM1	0.68529	6.34435e-94	2.62625e-92	669	669
PTRF	0.684891	8.94833e-94	3.68899e-92	669	669
CYBA	0.684856	9.21951e-94	3.79301e-92	669	669
S100A10	0.684845	9.30666e-94	3.82105e-92	669	669
PHLDA2	0.684217	1.59785e-93	6.53366e-92	669	648
BAK1	0.684162	1.67521e-93	6.83608e-92	669	669
FPR3	0.683964	1.98707e-93	8.05966e-92	669	669
LCP2	0.683638	2.62874e-93	1.06195e-91	669	669
SDF4	0.683435	3.12713e-93	1.26075e-91	669	669
SOAT1	0.683376	3.28899e-93	1.32336e-91	669	669
FCGRT	0.683158	3.96477e-93	1.59208e-91	669	669
CD68	0.682871	5.06525e-93	2.0259e-91	669	669
FERMT3	0.682514	6.87499e-93	2.73883e-91	669	669
DSE	0.682406	7.53889e-93	2.99738e-91	669	669
LAMB1	0.682317	8.12946e-93	3.22581e-91	669	669
OSMR	0.68211	9.7067e-93	3.84408e-91	669	669
GPR82	0.682036	1.03333e-92	4.0842e-91	669	644
MXRA5	0.682015	1.05187e-92	4.14931e-91	669	669
PDE6G	0.681928	1.13315e-92	4.46121e-91	669	667
P2RY6	0.681883	1.17694e-92	4.61552e-91	669	669
PTPN12	0.681763	1.30381e-92	5.10312e-91	669	669
PPIL5	0.681642	1.44488e-92	5.64428e-91	669	669
C1QA	0.681587	1.51503e-92	5.90686e-91	669	669
ENPEP	0.681323	1.89591e-92	7.34911e-91	669	669
MYD88	0.681262	1.99714e-92	7.72664e-91	669	669
CPVL	0.681215	2.07721e-92	8.02098e-91	669	669
CD80	0.680935	2.63424e-92	1.0133e-90	669	594
HLA-DOA	0.680833	2.87386e-92	1.09935e-90	669	669
IL1RN	0.680771	3.02821e-92	1.15382e-90	669	667
PRF1	0.680737	3.11803e-92	1.18579e-90	669	668
SMAGP	0.680724	3.1502e-92	1.19577e-90	669	669
VDR	0.680669	3.30233e-92	1.25115e-90	669	665
GSTK1	0.6805	3.81105e-92	1.44118e-90	669	669
NOX4	0.680489	3.84679e-92	1.45196e-90	669	669
ANO6	0.680457	3.951e-92	1.48851e-90	669	669
IL2RG	0.680025	5.69373e-92	2.14105e-90	669	669
HLA-A	0.679905	6.30277e-92	2.36125e-90	669	669
LAP3	0.679892	6.37393e-92	2.38347e-90	669	669
SLC26A2	0.679889	6.38664e-92	2.38379e-90	669	669
SPRY1	0.679801	6.88218e-92	2.56399e-90	669	669
MPZL2	0.679749	7.19193e-92	2.67444e-90	669	668
CD164	0.679353	1.00415e-91	3.7135e-90	669	669
LHFPL2	0.678946	1.41498e-91	5.21364e-90	669	669
TPRG1	0.678925	1.4398e-91	5.29542e-90	669	665
FXYD5	0.678659	1.80105e-91	6.61195e-90	669	669
DPAGT1	0.678621	1.85884e-91	6.81169e-90	669	669
PGM2	0.678414	2.212e-91	8.0911e-90	669	669
IER5L	0.678136	2.79493e-91	1.02048e-89	669	669
PMM2	0.678101	2.87615e-91	1.04823e-89	669	669
S100A9	0.678085	2.91638e-91	1.06097e-89	669	669
RAB8A	0.678064	2.96777e-91	1.07772e-89	669	669
SUSD2	0.677864	3.51126e-91	1.26821e-89	669	669
LEPREL1	0.677848	3.55765e-91	1.28267e-89	669	669
CAPG	0.67771	3.99233e-91	1.43681e-89	669	669
IL15	0.677523	4.66912e-91	1.67439e-89	669	668
CASP5	0.677423	5.07522e-91	1.81678e-89	669	578
RPN1	0.677407	5.1458e-91	1.83878e-89	669	669
CANT1	0.677278	5.73129e-91	2.04436e-89	669	669
CAST	0.677226	5.98698e-91	2.13179e-89	669	669
HOXA1	0.677203	6.10361e-91	2.16948e-89	669	600
DOK2	0.677	7.23367e-91	2.56661e-89	669	669
IGF2BP2	0.676846	8.22222e-91	2.91223e-89	669	669
LGALS3	0.676645	9.72512e-91	3.43849e-89	669	669
NUCB1	0.676539	1.06181e-90	3.74762e-89	669	669
IGF2BP3	0.676414	1.17912e-90	4.15437e-89	669	669
CHPF2	0.676021	1.63539e-90	5.73184e-89	669	669
CTHRC1	0.675808	1.95237e-90	6.79545e-89	669	669
SLC25A19	0.675779	2.00044e-90	6.95074e-89	669	669
CD40	0.675749	2.05046e-90	7.11226e-89	669	669
LGALS1	0.675744	2.05941e-90	7.13101e-89	669	669
ATF3	0.67527	3.05047e-90	1.05084e-88	669	669
NTAN1	0.67526	3.07714e-90	1.05822e-88	669	669
PRICKLE3	0.675256	3.08649e-90	1.05962e-88	669	669
MGST2	0.675197	3.24109e-90	1.11081e-88	669	669
LYN	0.674925	4.06193e-90	1.38976e-88	669	669
C1QC	0.674859	4.28944e-90	1.46511e-88	669	669
B3GNT5	0.674568	5.45832e-90	1.85805e-88	669	669
SEPN1	0.674507	5.74211e-90	1.95135e-88	669	669
C19orf10	0.674454	5.99483e-90	2.03037e-88	669	669
TNFAIP3	0.674439	6.06959e-90	2.05224e-88	669	669
BGN	0.67439	6.32125e-90	2.13374e-88	669	669
EHD2	0.674034	8.48755e-90	2.86018e-88	669	669
EMP1	0.67401	8.65145e-90	2.91053e-88	669	669
LILRB2	0.67378	1.04654e-89	3.51492e-88	669	669
COL6A3	0.673535	1.28021e-89	4.28542e-88	669	669
PROS1	0.673504	1.31382e-89	4.39062e-88	669	669
TYROBP	0.673432	1.39333e-89	4.6486e-88	669	669
TPM3	0.673202	1.68406e-89	5.60927e-88	669	669
GNS	0.673096	1.83812e-89	6.11228e-88	669	669
CCR2	0.673002	1.98455e-89	6.57745e-88	669	622
2020-09-15	0.672734	2.47361e-89	8.18488e-88	669	669
CABP4	0.672677	2.59196e-89	8.54836e-88	669	666
BATF3	0.672591	2.78221e-89	9.16082e-88	669	669
CASP7	0.672527	2.93329e-89	9.64246e-88	669	669
OR51E1	0.672488	3.02872e-89	9.93993e-88	669	558
FRRS1	0.672274	3.60794e-89	1.17832e-87	669	652
GLRX	0.672266	3.6318e-89	1.18419e-87	669	669
TNFSF12-TNFSF13	0.672237	3.71832e-89	1.21044e-87	669	568
APOBEC3F	0.672218	3.77927e-89	1.22829e-87	669	669
FPR2	0.67215	3.99356e-89	1.29585e-87	669	645
C6orf150	0.672071	4.26128e-89	1.38049e-87	669	668
SEC61A1	0.671972	4.61929e-89	1.49406e-87	669	669
RHOH	0.671894	4.9272e-89	1.5911e-87	669	669
LOXL1	0.671878	4.98976e-89	1.60872e-87	669	669
ARL11	0.671695	5.79529e-89	1.85948e-87	669	669
GAPT	0.671576	6.38852e-89	2.04656e-87	669	666
CD2	0.671512	6.73282e-89	2.15001e-87	669	654
VAMP5	0.67142	7.26021e-89	2.30809e-87	669	669
JAG1	0.671404	7.35034e-89	2.3324e-87	669	669
MS4A4A	0.670934	1.07881e-88	3.40715e-87	669	669
COL5A2	0.67033	1.76476e-88	5.56479e-87	669	669
A2M	0.670305	1.80138e-88	5.67139e-87	669	669
PALLD	0.670186	1.98435e-88	6.21824e-87	669	669
RAP2B	0.670182	1.99119e-88	6.22997e-87	669	669
NFKBIZ	0.670161	2.02527e-88	6.32676e-87	669	669
ZDHHC18	0.670009	2.29057e-88	7.14445e-87	669	669
CLEC18B	0.669876	2.55276e-88	7.94992e-87	669	669
CST7	0.669791	2.73547e-88	8.49263e-87	669	655
TMEM173	0.669553	3.31689e-88	1.0266e-86	669	669
SASH3	0.669544	3.34125e-88	1.03255e-86	669	669
LXN	0.669538	3.3579e-88	1.03611e-86	669	669
TMEM43	0.669152	4.59138e-88	1.41238e-86	669	669
LILRA6	0.669036	5.04237e-88	1.54874e-86	669	667
RELL1	0.668736	6.42861e-88	1.96851e-86	669	669
CALHM2	0.668621	7.0518e-88	2.15605e-86	669	669
TNFSF14	0.668492	7.83068e-88	2.38693e-86	669	512
NOP10	0.668426	8.25969e-88	2.5139e-86	669	669
RGS16	0.668384	8.54318e-88	2.59625e-86	669	669
LAPTM5	0.668286	9.24304e-88	2.8047e-86	669	669
LILRB3	0.668218	9.76821e-88	2.95959e-86	669	666
TMEM165	0.66805	1.11839e-87	3.38343e-86	669	669
MGAT1	0.667534	1.69406e-87	5.09435e-86	669	669
IL6	0.667294	2.05452e-87	6.16908e-86	669	654
KIAA1949	0.667275	2.08632e-87	6.25523e-86	669	669
SPPL2A	0.667143	2.32124e-87	6.9492e-86	669	669
CD300LF	0.666877	2.8734e-87	8.58946e-86	669	669
APOL4	0.666604	3.57561e-87	1.06569e-85	669	669
TMED10	0.666472	3.97697e-87	1.18356e-85	669	669
TWF2	0.665948	6.04742e-87	1.78652e-85	669	669
HLA-DQA1	0.665894	6.31339e-87	1.86236e-85	669	669
SPATS2L	0.665728	7.21184e-87	2.12427e-85	669	669
APOBEC3D	0.665407	9.31544e-87	2.7319e-85	669	668
PSMC2	0.665361	9.66698e-87	2.83086e-85	669	669
TMSB10	0.66527	1.03926e-86	3.03894e-85	669	669
CA3	0.665107	1.18341e-86	3.45542e-85	669	669
ARHGAP18	0.664754	1.56719e-86	4.56939e-85	669	669
MAN2B1	0.664625	1.7374e-86	5.051e-85	669	669
RNASE4	0.664326	2.20417e-86	6.38956e-85	669	669
MFAP2	0.664276	2.29325e-86	6.63822e-85	669	661
RAB34	0.664157	2.52069e-86	7.2861e-85	669	669
NFAM1	0.663965	2.93579e-86	8.47379e-85	669	669
HTRA3	0.663807	3.32615e-86	9.58674e-85	669	668
IQGAP2	0.663644	3.78481e-86	1.08775e-84	669	669
DPY19L1	0.663538	4.11584e-86	1.1812e-84	669	669
MR1	0.663534	4.1305e-86	1.18372e-84	669	669
DIRAS3	0.66349	4.27701e-86	1.22397e-84	669	669
CTSL1	0.663375	4.68545e-86	1.33895e-84	669	669
LAIR1	0.663253	5.1606e-86	1.47264e-84	669	669
C9orf167	0.663105	5.79925e-86	1.6502e-84	669	669
SLC35A2	0.662922	6.70301e-86	1.90199e-84	669	669
ADAP2	0.662802	7.37113e-86	2.08863e-84	669	669
TXNDC12	0.662785	7.47251e-86	2.11437e-84	669	669
TMEM149	0.662748	7.69017e-86	2.1729e-84	669	669
DTX2	0.662427	9.90879e-86	2.79195e-84	669	669
MMP11	0.662286	1.10733e-85	3.11135e-84	669	669
WEE1	0.662232	1.156e-85	3.23904e-84	669	669
PLIN2	0.662122	1.2602e-85	3.5261e-84	669	669
DYRK3	0.662118	1.26468e-85	3.53373e-84	669	669
CRLF3	0.66196	1.43178e-85	3.9951e-84	669	669
FAM26F	0.661854	1.5569e-85	4.33819e-84	669	669
CYP2S1	0.661732	1.71334e-85	4.7675e-84	669	669
ITPKC	0.661635	1.84973e-85	5.13989e-84	669	669
GPR141	0.661551	1.97566e-85	5.48224e-84	669	545
NCF1	0.661331	2.34819e-85	6.47137e-84	669	669
THBD	0.661168	2.66933e-85	7.33627e-84	669	669
TMEM194B	0.661054	2.91837e-85	8.0098e-84	669	669
FES	0.660651	4.00211e-85	1.09544e-83	669	669
RARS	0.660621	4.09838e-85	1.12026e-83	669	669
ARHGAP15	0.660432	4.75358e-85	1.29583e-83	669	669
LDHA	0.66042	4.79592e-85	1.30561e-83	669	669
GZMA	0.660274	5.37822e-85	1.46215e-83	669	630
COL15A1	0.659789	7.85555e-85	2.12989e-83	669	669
IGFBP4	0.659501	9.83787e-85	2.65662e-83	669	669
SURF4	0.658972	1.48527e-84	3.99475e-83	669	669
C19orf40	0.658523	2.10679e-84	5.62875e-83	669	669
SIT1	0.658435	2.25466e-84	6.00786e-83	669	593
FPR1	0.658173	2.7637e-84	7.34481e-83	669	669
C1orf54	0.658136	2.84434e-84	7.54912e-83	669	669
FUCA1	0.658125	2.86856e-84	7.6034e-83	669	669
IL4I1	0.657805	3.67644e-84	9.73193e-83	669	669
CCL5	0.657718	3.93277e-84	1.03695e-82	669	669
SAA1	0.65758	4.37793e-84	1.15282e-82	669	377
SERTAD3	0.65713	6.19753e-84	1.62135e-82	669	669
ZNF217	0.656772	8.17486e-84	2.13033e-82	669	669
CHEK2	0.656603	9.31117e-84	2.42018e-82	669	669
OST4	0.656538	9.79307e-84	2.54215e-82	669	669
CLEC12A	0.656431	1.06304e-83	2.75242e-82	669	581
CHSY1	0.656374	1.11141e-83	2.87396e-82	669	669
TLR1	0.655398	2.35314e-83	6.05376e-82	669	669
SLC25A24	0.655282	2.57246e-83	6.60955e-82	669	669
HLX	0.65528	2.57721e-83	6.61331e-82	669	669
ZDHHC12	0.655221	2.69583e-83	6.90889e-82	669	669
MLX	0.655187	2.76811e-83	7.0851e-82	669	669
RNFT1	0.655064	3.04073e-83	7.77298e-82	669	669
KLHDC7B	0.655052	3.06993e-83	7.83767e-82	669	666
RIT1	0.654876	3.51328e-83	8.94685e-82	669	669
STK17A	0.654723	3.94905e-83	1.00312e-81	669	669
ANGPT2	0.654579	4.40986e-83	1.11876e-81	669	669
CD300C	0.654187	5.95277e-83	1.50639e-81	669	669
HFE	0.654097	6.37459e-83	1.61111e-81	669	669
MYBPH	0.654013	6.79769e-83	1.71588e-81	669	631
CAV1	0.653849	7.70306e-83	1.94198e-81	669	669
GJC1	0.65367	8.83614e-83	2.22207e-81	669	669
ITGB2	0.653639	9.04373e-83	2.27143e-81	669	669
STAB1	0.653627	9.12629e-83	2.28931e-81	669	669
MFSD1	0.653609	9.25711e-83	2.31924e-81	669	669
MANF	0.653576	9.48852e-83	2.37425e-81	669	669
PROCR	0.653471	1.02826e-82	2.56975e-81	669	669
ECSCR	0.653437	1.05524e-82	2.63392e-81	669	669
HCP5	0.65337	1.11024e-82	2.76776e-81	669	669
MCAM	0.65295	1.52916e-82	3.79799e-81	669	669
GIMAP2	0.652683	1.87311e-82	4.6408e-81	669	669
AHR	0.652675	1.88384e-82	4.66164e-81	669	669
FTL	0.65249	2.16863e-82	5.35319e-81	669	669
DERL2	0.652412	2.30062e-82	5.67203e-81	669	669
CAP1	0.652251	2.59921e-82	6.40035e-81	669	669
SLAMF1	0.652174	2.75691e-82	6.78037e-81	669	503
SNAI1	0.652119	2.87312e-82	7.05756e-81	669	669
GPN1	0.65183	3.57728e-82	8.77654e-81	669	669
APOL1	0.651778	3.7197e-82	9.11486e-81	669	669
F13A1	0.651742	3.82461e-82	9.36053e-81	669	669
YIPF1	0.651659	4.07097e-82	9.95137e-81	669	669
PSMB8	0.651637	4.13917e-82	1.01058e-80	669	669
SH2D4A	0.651605	4.24211e-82	1.03446e-80	669	668
DTX3L	0.651264	5.49101e-82	1.33577e-80	669	669
PLB1	0.651049	6.45849e-82	1.56923e-80	669	669
HEBP2	0.650839	7.56995e-82	1.83706e-80	669	669
TGFB1	0.650821	7.67332e-82	1.8599e-80	669	669
TMEM51	0.650339	1.10311e-81	2.66097e-80	669	669
OSCAR	0.650281	1.15241e-81	2.77655e-80	669	669
LRRC32	0.650232	1.19589e-81	2.87441e-80	669	669
HOXB3	0.649979	1.44648e-81	3.46846e-80	669	648
C5orf15	0.649759	1.70719e-81	4.08873e-80	669	669
FRMD8	0.649736	1.73645e-81	4.14892e-80	669	669
NRM	0.64969	1.79796e-81	4.29079e-80	669	669
NCF4	0.649673	1.82143e-81	4.34166e-80	669	669
ARF6	0.649603	1.91918e-81	4.56924e-80	669	669
PLOD3	0.649496	2.08047e-81	4.93571e-80	669	669
HM13	0.649294	2.41952e-81	5.73332e-80	669	669
ERP44	0.649094	2.81193e-81	6.65534e-80	669	669
C14orf119	0.649056	2.89363e-81	6.84067e-80	669	669
NUP37	0.648841	3.3985e-81	8.01535e-80	669	669
SOCS1	0.648772	3.57931e-81	8.4319e-80	669	669
LRRC15	0.64873	3.69203e-81	8.68728e-80	669	545
LMAN2	0.648257	5.26227e-81	1.23387e-79	669	669
CYP19A1	0.648173	5.60281e-81	1.31219e-79	669	666
KDELC2	0.64814	5.74062e-81	1.3429e-79	669	669
MICB	0.648047	6.15485e-81	1.43813e-79	669	669
GNAI3	0.647852	7.11677e-81	1.65904e-79	669	669
C13orf18	0.647732	7.78566e-81	1.81287e-79	669	669
C11orf24	0.647725	7.82609e-81	1.82018e-79	669	669
CD97	0.647625	8.43031e-81	1.95844e-79	669	669
RIPK3	0.647407	9.92015e-81	2.29659e-79	669	669
ITGA4	0.64716	1.19206e-80	2.75338e-79	669	669
CLDN23	0.64714	1.20978e-80	2.7911e-79	669	667
F11R	0.647056	1.2882e-80	2.96862e-79	669	669
C1orf144	0.646562	1.85948e-80	4.27532e-79	669	669
THBS1	0.646369	2.14595e-80	4.90594e-79	669	669
FBLN5	0.64636	2.16043e-80	4.93343e-79	669	669
TNFRSF10C	0.646112	2.59623e-80	5.90848e-79	669	669
CDC42	0.645971	2.88237e-80	6.55227e-79	669	669
SBNO2	0.645926	2.98175e-80	6.77053e-79	669	669
WIPI1	0.645586	3.8337e-80	8.66587e-79	669	669
SDC1	0.64546	4.20983e-80	9.50543e-79	669	669
VNN2	0.645368	4.50357e-80	1.01459e-78	669	668
ITPRIPL1	0.645153	5.27922e-80	1.188e-78	669	669
CLP1	0.645101	5.48717e-80	1.23342e-78	669	669
CNIH4	0.644961	6.0846e-80	1.36466e-78	669	669
PLEK	0.644698	7.38761e-80	1.65138e-78	669	669
TLR8	0.64467	7.53983e-80	1.68353e-78	669	667
ALG2	0.6446	7.94218e-80	1.77141e-78	669	669
ATP6V1C2	0.644576	8.08494e-80	1.79926e-78	669	669
PRDX4	0.644558	8.18899e-80	1.81839e-78	669	669
CAPN5	0.644526	8.38713e-80	1.86033e-78	669	669
HOXA5	0.644302	9.89244e-80	2.1894e-78	669	445
SPI1	0.644236	1.03814e-79	2.29509e-78	669	669
SPINT1	0.644141	1.1133e-79	2.45585e-78	669	669
SH3BGRL3	0.644128	1.12431e-79	2.47742e-78	669	669
LOC400759	0.643891	1.3382e-79	2.94229e-78	669	658
PTGS1	0.643759	1.47454e-79	3.23852e-78	669	669
HPS3	0.643678	1.5649e-79	3.42949e-78	669	669
PPIB	0.643609	1.64678e-79	3.605e-78	669	669
BZW1	0.643547	1.72367e-79	3.76922e-78	669	669
P4HA3	0.643364	1.97134e-79	4.30146e-78	669	661
CCL20	0.643333	2.01566e-79	4.3934e-78	669	562
KRT80	0.64302	2.53626e-79	5.5102e-78	669	525
TNFAIP6	0.642954	2.6612e-79	5.76918e-78	669	668
ALOX5	0.642881	2.80893e-79	6.08289e-78	669	669
ASPN	0.642692	3.22408e-79	6.95199e-78	669	668
UNC93B1	0.642556	3.56137e-79	7.66286e-78	669	669
TMEM50A	0.642483	3.75876e-79	8.07893e-78	669	669
CD3D	0.642442	3.8731e-79	8.3158e-78	669	555
COQ2	0.642392	4.01605e-79	8.61352e-78	669	669
CD53	0.642334	4.19133e-79	8.97035e-78	669	669
SUMF1	0.642315	4.24905e-79	9.08421e-78	669	669
LOC100216001	0.64192	5.66806e-79	1.20795e-77	669	512
FILIP1L	0.641699	6.66333e-79	1.41855e-77	669	669
LTBP2	0.641648	6.9144e-79	1.47044e-77	669	669
CD96	0.641642	6.94378e-79	1.47513e-77	669	648
MGAT4B	0.641579	7.27144e-79	1.54148e-77	669	669
ACTN4	0.641464	7.90715e-79	1.67449e-77	669	669
MGP	0.641341	8.64587e-79	1.829e-77	669	669
TGFBR1	0.641296	8.93258e-79	1.88568e-77	669	669
KLF6	0.641124	1.01274e-78	2.13567e-77	669	669
MUC1	0.641065	1.05704e-78	2.22676e-77	669	669
TBC1D10C	0.640517	1.57387e-78	3.30168e-77	669	669
RPS6KA1	0.640407	1.70501e-78	3.56193e-77	669	669
C2orf28	0.640142	2.06707e-78	4.31383e-77	669	669
TEAD3	0.639826	2.5974e-78	5.41498e-77	669	669
MTFR1	0.639778	2.69053e-78	5.60333e-77	669	669
LMO2	0.639493	3.30644e-78	6.87891e-77	669	669
HEXA	0.639317	3.75348e-78	7.79282e-77	669	669
CSF2RB	0.63902	4.6535e-78	9.64152e-77	669	669
NRBP1	0.638969	4.82918e-78	9.99521e-77	669	669
HDAC3	0.638597	6.31378e-78	1.30278e-76	669	669
MLKL	0.638414	7.20275e-78	1.48468e-76	669	669
TXLNA	0.638392	7.31672e-78	1.50663e-76	669	669
EXT2	0.63833	7.65198e-78	1.57405e-76	669	669
CHST14	0.638064	9.26445e-78	1.89992e-76	669	669
HLA-C	0.638006	9.66268e-78	1.97957e-76	669	669
LATS2	0.63774	1.16957e-77	2.39364e-76	669	669
SPINK8	0.637737	1.17202e-77	2.39621e-76	669	610
PSMB9	0.637669	1.23136e-77	2.51278e-76	669	669
CEP55	0.637668	1.23153e-77	2.51278e-76	669	668
HOXA4	0.63766	1.23893e-77	2.5253e-76	669	526
ABHD15	0.637588	1.30443e-77	2.65612e-76	669	669
BTN2A2	0.637417	1.47503e-77	3.00048e-76	669	669
ZNRF2	0.637353	1.54405e-77	3.13136e-76	669	669
SRGN	0.637322	1.5793e-77	3.19641e-76	669	669
COL8A1	0.637039	1.93391e-77	3.90234e-76	669	667
SHKBP1	0.636953	2.05726e-77	4.13879e-76	669	669
C20orf30	0.63673	2.41464e-77	4.85293e-76	669	669
ARAP3	0.636657	2.54277e-77	5.10533e-76	669	669
TRAM2	0.63655	2.74582e-77	5.50751e-76	669	669
ACPP	0.636501	2.84411e-77	5.69898e-76	669	657
CXCR3	0.636404	3.04888e-77	6.09716e-76	669	576
VEGFA	0.636287	3.31297e-77	6.6187e-76	669	669
ABI3	0.636258	3.38432e-77	6.75454e-76	669	669
CFLAR	0.635987	4.10467e-77	8.15985e-76	669	669
SFRP4	0.635694	5.05965e-77	1.00385e-75	669	669
IL1RAP	0.635488	5.86086e-77	1.15938e-75	669	669
TOR1B	0.63514	7.50789e-77	1.47937e-75	669	669
TMEM176B	0.635079	7.84021e-77	1.54334e-75	669	669
WTAP	0.635077	7.85518e-77	1.54478e-75	669	669
CYTH4	0.635065	7.92014e-77	1.55603e-75	669	669
PPP1CA	0.635003	8.27661e-77	1.62448e-75	669	669
C1QTNF6	0.634932	8.70719e-77	1.70732e-75	669	669
ITGA3	0.63484	9.29532e-77	1.8191e-75	669	669
TMEM109	0.634767	9.78646e-77	1.91335e-75	669	669
SPON2	0.634745	9.9473e-77	1.94291e-75	669	669
CTBS	0.634629	1.07978e-76	2.10495e-75	669	669
HOXA3	0.634448	1.22776e-76	2.38879e-75	669	433
IL4R	0.634256	1.40689e-76	2.73202e-75	669	669
FUCA2	0.634142	1.52565e-76	2.95409e-75	669	669
OLFML2B	0.634031	1.65017e-76	3.19212e-75	669	669
BAX	0.633672	2.12795e-76	4.10451e-75	669	669
SLAMF6	0.633617	2.21217e-76	4.2588e-75	669	654
TMEM217	0.633568	2.29146e-76	4.40723e-75	669	669
CLEC7A	0.633508	2.39106e-76	4.59002e-75	669	669
TREML2	0.633488	2.4243e-76	4.64939e-75	669	512
TRIM21	0.633366	2.64279e-76	5.06358e-75	669	669
ZNF600	0.633248	2.87279e-76	5.4938e-75	669	669
BTG3	0.633209	2.95264e-76	5.64115e-75	669	669
TRIP10	0.633176	3.02358e-76	5.77119e-75	669	669
GGCX	0.633101	3.18803e-76	6.07355e-75	669	669
S100A8	0.632894	3.68748e-76	7.00517e-75	669	667
HMGA2	0.63266	4.34963e-76	8.25526e-75	669	463
GPSM3	0.63261	4.50574e-76	8.53546e-75	669	669
CYTIP	0.632406	5.20483e-76	9.83199e-75	669	669
GBE1	0.632397	5.23812e-76	9.88561e-75	669	669
LOXL3	0.632284	5.67076e-76	1.06921e-74	669	669
CXCR6	0.632106	6.42563e-76	1.2104e-74	669	624
TEAD2	0.631869	7.59294e-76	1.42761e-74	669	669
STT3A	0.631475	1.00192e-75	1.88028e-74	669	669
CD3E	0.631264	1.16129e-75	2.1733e-74	669	654
PIK3R6	0.630896	1.50317e-75	2.80786e-74	669	669
RFC2	0.630872	1.52901e-75	2.85349e-74	669	669
NXT1	0.630697	1.72837e-75	3.21659e-74	669	669
LRRC42	0.630677	1.75195e-75	3.25746e-74	669	669
SH3GLB1	0.630514	1.96431e-75	3.64894e-74	669	669
SLC2A9	0.630387	2.14641e-75	3.98354e-74	669	669
PLSCR3	0.630241	2.37791e-75	4.4091e-74	669	669
SHCBP1	0.62988	3.06008e-75	5.65833e-74	669	669
KLF17	0.629816	3.19965e-75	5.90555e-74	669	639
FMOD	0.629721	3.41751e-75	6.30188e-74	669	669
IFITM2	0.629628	3.64614e-75	6.71731e-74	669	669
PPM1M	0.629325	4.50416e-75	8.26023e-74	669	669
IRAK4	0.629096	5.28251e-75	9.67883e-74	669	669
PLEKHA9	0.62902	5.56889e-75	1.0185e-73	669	669
ESYT1	0.628995	5.67024e-75	1.03609e-73	669	669
PPIC	0.628872	6.17348e-75	1.12498e-73	669	669
CEBPD	0.628871	6.18039e-75	1.12522e-73	669	669
FAM111A	0.62867	7.1058e-75	1.29254e-73	669	669
SMC4	0.62852	7.8842e-75	1.43154e-73	669	669
CASP3	0.628295	9.22233e-75	1.66998e-73	669	669
NKX2-5	0.628281	9.30768e-75	1.68241e-73	669	519
NKG7	0.62801	1.12353e-74	2.01995e-73	669	665
HPD	0.627954	1.1678e-74	2.09765e-73	669	594
ZNF552	0.627911	1.2036e-74	2.15811e-73	669	669
CD69	0.627881	1.2285e-74	2.2008e-73	669	669
TBL2	0.627406	1.70684e-74	3.04687e-73	669	669
GSDMD	0.627304	1.8321e-74	3.26467e-73	669	669
LAMA4	0.627301	1.83524e-74	3.26738e-73	669	669
AGTRAP	0.626961	2.32209e-74	4.1232e-73	669	669
CXCL9	0.6267	2.77966e-74	4.92264e-73	669	661
IDO1	0.626418	3.37711e-74	5.97018e-73	669	445
C16orf54	0.626408	3.40098e-74	6.00711e-73	669	669
S1PR3	0.626112	4.17048e-74	7.35979e-73	669	669
CPA4	0.626042	4.37345e-74	7.69773e-73	669	640
GNGT2	0.625967	4.60576e-74	8.09954e-73	669	669
TIFA	0.625693	5.56109e-74	9.73699e-73	669	669
HEATR2	0.625569	6.05725e-74	1.05873e-72	669	669
IKBKE	0.625544	6.16122e-74	1.07597e-72	669	669
CFD	0.625531	6.21506e-74	1.08443e-72	669	669
IFI16	0.625528	6.23159e-74	1.08637e-72	669	669
CCNYL1	0.625141	8.12816e-74	1.41455e-72	669	669
CD4	0.625132	8.1738e-74	1.42127e-72	669	669
WDR77	0.625105	8.32846e-74	1.44566e-72	669	669
COL6A1	0.62469	1.10715e-73	1.92015e-72	669	669
TTC26	0.624577	1.19619e-73	2.06921e-72	669	669
PPP4C	0.624492	1.26726e-73	2.19027e-72	669	669
ALG3	0.624471	1.28624e-73	2.22117e-72	669	669
HRH1	0.624358	1.38957e-73	2.39548e-72	669	669
NAT1	0.624089	1.6694e-73	2.87051e-72	669	669
ZC3H12A	0.623943	1.84485e-73	3.16678e-72	669	669
C3orf64	0.623721	2.14735e-73	3.67976e-72	669	669
MOBKL1B	0.623592	2.34513e-73	4.01185e-72	669	669
CD28	0.623439	2.60324e-73	4.44961e-72	669	639
HOXB2	0.62332	2.82144e-73	4.81439e-72	669	659
ELK3	0.623294	2.87291e-73	4.89807e-72	669	669
MAGT1	0.623157	3.15494e-73	5.3698e-72	669	669
C2orf29	0.623044	3.40729e-73	5.78952e-72	669	669
GPNMB	0.622991	3.53221e-73	5.99672e-72	669	669
MMP7	0.622772	4.09792e-73	6.9454e-72	669	575
DCBLD2	0.622716	4.25848e-73	7.21146e-72	669	669
CAPNS1	0.622606	4.58744e-73	7.72948e-72	669	669
APEX2	0.622557	4.74247e-73	7.98401e-72	669	669
LCP1	0.622459	5.06952e-73	8.52748e-72	669	669
LOC100233209	0.622408	5.24865e-73	8.82142e-72	669	668
PRKCDBP	0.622287	5.69976e-73	9.5716e-72	669	669
C13orf29	0.622277	5.73774e-73	9.62734e-72	669	669
VASN	0.622208	6.01222e-73	1.00795e-71	669	669
CCR1	0.622165	6.18996e-73	1.03688e-71	669	669
RRAS	0.62205	6.69206e-73	1.12006e-71	669	669
LYPLA1	0.621992	6.96091e-73	1.16409e-71	669	669
UCP2	0.621986	6.98879e-73	1.16778e-71	669	669
RNF19B	0.621355	1.07207e-72	1.78394e-71	669	669
TMEM60	0.621327	1.09259e-72	1.81658e-71	669	669
LSM10	0.62106	1.30865e-72	2.16687e-71	669	669
MED8	0.620741	1.62335e-72	2.68352e-71	669	669
FZD5	0.620496	1.91559e-72	3.16144e-71	669	669
CLEC18C	0.620481	1.9348e-72	3.1879e-71	669	661
GBGT1	0.620455	1.96871e-72	3.24112e-71	669	669
SEPHS2	0.620444	1.98291e-72	3.26183e-71	669	669
SLC35F5	0.620414	2.02467e-72	3.3278e-71	669	669
PYCARD	0.62013	2.45027e-72	4.01421e-71	669	669
TNFRSF14	0.620087	2.52223e-72	4.12875e-71	669	669
FKBP9	0.620084	2.52773e-72	4.13438e-71	669	669
JUB	0.619909	2.84513e-72	4.64974e-71	669	669
ATG4A	0.619823	3.01397e-72	4.91769e-71	669	669
BMP1	0.619716	3.23783e-72	5.27866e-71	669	669
DNAJB1	0.619581	3.54666e-72	5.77278e-71	669	669
ARF4	0.619515	3.70867e-72	6.02674e-71	669	669
NIP7	0.619466	3.83284e-72	6.22349e-71	669	669
LILRA5	0.619463	3.83977e-72	6.22972e-71	669	601
NID2	0.619244	4.44848e-72	7.21148e-71	669	669
CDCA4	0.619213	4.54279e-72	7.35844e-71	669	669
LGALS3BP	0.61909	4.93125e-72	7.98124e-71	669	669
UBE2A	0.61907	4.99892e-72	8.08426e-71	669	669
TP53I13	0.619025	5.15194e-72	8.32505e-71	669	669
C21orf63	0.618946	5.434e-72	8.77377e-71	669	669
NOD1	0.618789	6.03514e-72	9.72876e-71	669	669
TMEM106A	0.618482	7.41679e-72	1.19083e-70	669	669
ITGA1	0.61848	7.42519e-72	1.19123e-70	669	669
TRPV4	0.618477	7.43854e-72	1.19242e-70	669	669
TRPV2	0.61805	9.89972e-72	1.58443e-70	669	669
GINS4	0.617995	1.02685e-71	1.64215e-70	669	669
EFEMP2	0.61797	1.04466e-71	1.66929e-70	669	669
CXCR4	0.617889	1.1024e-71	1.76016e-70	669	669
TNFRSF10D	0.617813	1.15989e-71	1.85049e-70	669	669
ETHE1	0.617638	1.30367e-71	2.07823e-70	669	669
SERINC2	0.617611	1.32746e-71	2.11447e-70	669	669
SHOX2	0.617502	1.42732e-71	2.27174e-70	669	586
MAP1LC3C	0.617087	1.88248e-71	2.98673e-70	669	628
DEPDC1	0.616979	2.02351e-71	3.20796e-70	669	668
SLC2A4RG	0.616856	2.19647e-71	3.47668e-70	669	669
PVT1	0.616416	2.9421e-71	4.64593e-70	669	668
HCK	0.616322	3.1329e-71	4.94334e-70	669	669
SLC30A5	0.616312	3.15404e-71	4.9728e-70	669	669
STX11	0.616217	3.35865e-71	5.29125e-70	669	669
MMP2	0.616186	3.42796e-71	5.39621e-70	669	669
MAGOH	0.615997	3.88581e-71	6.09788e-70	669	669
ARHGAP25	0.615922	4.08582e-71	6.40175e-70	669	669
ANTXR2	0.615908	4.12383e-71	6.45629e-70	669	669
WARS	0.615515	5.35132e-71	8.35853e-70	669	669
TAGLN	0.615301	6.16756e-71	9.61107e-70	669	669
LAMP3	0.615276	6.26645e-71	9.75761e-70	669	669
CELSR1	0.615242	6.41165e-71	9.97598e-70	669	669
P2RX4	0.615165	6.74592e-71	1.04732e-69	669	669
HDAC1	0.61509	7.09076e-71	1.09986e-69	669	669
OSR2	0.614744	8.91008e-71	1.37887e-69	669	571
CMTM7	0.614689	9.24027e-71	1.42887e-69	669	669
ASB9	0.614476	1.06374e-70	1.63988e-69	669	668
SSR3	0.614251	1.23381e-70	1.89769e-69	669	669
PARVG	0.614081	1.38037e-70	2.11987e-69	669	669
CRIP1	0.613959	1.49592e-70	2.29382e-69	669	669
FBXO39	0.61366	1.82133e-70	2.78643e-69	669	553
TNFRSF1B	0.613634	1.85234e-70	2.83172e-69	669	669
SIL1	0.613628	1.86057e-70	2.84213e-69	669	669
FGL2	0.613494	2.03117e-70	3.10038e-69	669	669
PLVAP	0.61334	2.24771e-70	3.42832e-69	669	669
SAA2	0.613264	2.36382e-70	3.60268e-69	669	433
SLC34A2	0.613145	2.55577e-70	3.88933e-69	669	628
TMBIM1	0.612764	3.28287e-70	4.98828e-69	669	669
SLFN12	0.612452	4.02612e-70	6.1038e-69	669	669
FCGR1A	0.612308	4.42442e-70	6.7026e-69	669	669
TMEM179B	0.612289	4.48067e-70	6.77761e-69	669	669
ATF5	0.612253	4.58665e-70	6.93269e-69	669	669
NCF1C	0.611571	7.16487e-70	1.07972e-68	669	666
PCNA	0.611538	7.32081e-70	1.1024e-68	669	669
ATP5EP2	0.611533	7.34813e-70	1.10568e-68	669	669
IL15RA	0.611523	7.39348e-70	1.11167e-68	669	669
CNPY4	0.611462	7.69537e-70	1.15534e-68	669	669
NCF2	0.611428	7.86609e-70	1.18009e-68	669	669
KTI12	0.611421	7.90496e-70	1.18504e-68	669	669
SLC4A7	0.611145	9.46277e-70	1.4133e-68	669	669
PRR24	0.611134	9.53202e-70	1.42259e-68	669	669
TWSG1	0.611096	9.77421e-70	1.45765e-68	669	669
APOC2	0.611092	9.79781e-70	1.46009e-68	669	669
HS2ST1	0.611057	1.00217e-69	1.49235e-68	669	669
TMEM147	0.61101	1.03318e-69	1.5374e-68	669	669
ARHGAP9	0.610699	1.26568e-69	1.87641e-68	669	669
FOSL2	0.610558	1.38703e-69	2.0533e-68	669	669
FPGT	0.610203	1.74768e-69	2.57959e-68	669	669
HOXA7	0.610044	1.9382e-69	2.85871e-68	669	538
GPBAR1	0.60985	2.19822e-69	3.23984e-68	669	667
HAVCR2	0.609803	2.26665e-69	3.33824e-68	669	669
C17orf60	0.609761	2.32906e-69	3.42765e-68	669	669
SNRNP40	0.609657	2.49234e-69	3.65991e-68	669	669
HOXB7	0.609417	2.91206e-69	4.26693e-68	669	657
KCNJ15	0.609293	3.15404e-69	4.61476e-68	669	609
ADM	0.609138	3.48724e-69	5.09487e-68	669	669
LCTL	0.60901	3.78889e-69	5.52355e-68	669	665
NSUN7	0.608645	4.79874e-69	6.9856e-68	669	667
LOC284276	0.608617	4.88751e-69	7.10968e-68	669	432
TLR2	0.60856	5.06903e-69	7.3684e-68	669	669
MUL1	0.608449	5.44558e-69	7.91005e-68	669	669
TMED2	0.60825	6.19542e-69	8.97979e-68	669	669
GRAP	0.608244	6.21873e-69	9.00708e-68	669	669
NUDT19	0.607585	9.50716e-69	1.37403e-67	669	669
CD70	0.607518	9.9291e-69	1.43398e-67	669	479
TMED5	0.6075	1.00453e-68	1.44972e-67	669	669
CYTL1	0.607422	1.0565e-68	1.52363e-67	669	668
HLA-E	0.60742	1.05763e-68	1.52417e-67	669	669
FAS	0.607392	1.07681e-68	1.5507e-67	669	669
HIC1	0.607207	1.21329e-68	1.7435e-67	669	669
CATSPER1	0.606947	1.43374e-68	2.05295e-67	669	533
CENPA	0.606908	1.47006e-68	2.10346e-67	669	667
C20orf72	0.606816	1.5592e-68	2.22784e-67	669	669
ERGIC1	0.606744	1.63321e-68	2.33027e-67	669	669
RHOJ	0.606561	1.83741e-68	2.61978e-67	669	669
NECAP2	0.60645	1.97213e-68	2.80729e-67	669	669
C1orf162	0.606449	1.97312e-68	2.80729e-67	669	669
DPEP1	0.606379	2.06458e-68	2.93535e-67	669	618
FLII	0.606126	2.42777e-68	3.44199e-67	669	669
PLXND1	0.606084	2.49362e-68	3.53287e-67	669	669
CDCA8	0.605934	2.74525e-68	3.88389e-67	669	669
KPNA2	0.605631	3.33365e-68	4.71303e-67	669	669
CXCL11	0.605494	3.63764e-68	5.13558e-67	669	648
C3	0.605384	3.90184e-68	5.50086e-67	669	669
C12orf48	0.605371	3.93668e-68	5.54608e-67	669	669
CFB	0.605139	4.56495e-68	6.42671e-67	669	669
CD33	0.605006	4.96989e-68	6.98701e-67	669	669
GEMIN7	0.604881	5.38166e-68	7.56063e-67	669	669
RNPEP	0.604877	5.39355e-68	7.57205e-67	669	669
DAPP1	0.604705	6.0217e-68	8.44212e-67	669	669
HIST1H2BH	0.60464	6.27329e-68	8.78873e-67	669	400
TNNI2	0.604624	6.33825e-68	8.87356e-67	669	634
DOK1	0.604493	6.88941e-68	9.63176e-67	669	669
SIRPG	0.604457	7.05033e-68	9.84989e-67	669	544
TPD52L2	0.604279	7.89586e-68	1.10082e-66	669	669
PDCD1	0.604188	8.36902e-68	1.16518e-66	669	638
MAPKAPK2	0.604098	8.85894e-68	1.23253e-66	669	669
FAM126A	0.603906	1.00118e-67	1.391e-66	669	669
FAM96A	0.603575	1.23514e-67	1.71369e-66	669	669
LOC100130776	0.60356	1.2473e-67	1.72938e-66	669	669
PTBP1	0.60351	1.28752e-67	1.78391e-66	669	669
PPP1CB	0.603407	1.37419e-67	1.90006e-66	669	669
NLRC5	0.603371	1.40654e-67	1.94345e-66	669	669
NANP	0.602844	1.96444e-67	2.70504e-66	669	669
GAB3	0.602837	1.97315e-67	2.71517e-66	669	669
PTPN6	0.602687	2.1695e-67	2.97518e-66	669	669
SLC27A3	0.602473	2.48328e-67	3.40085e-66	669	669
HOXC6	0.602317	2.74057e-67	3.74812e-66	669	463
AURKA	0.602305	2.76137e-67	3.774e-66	669	669
LAMB2	0.602211	2.93042e-67	3.99961e-66	669	669
IL7	0.601835	3.71653e-67	5.06224e-66	669	666
NUP54	0.601737	3.95358e-67	5.38147e-66	669	669
CAV2	0.60167	4.12465e-67	5.61052e-66	669	669
CLDN7	0.601645	4.19041e-67	5.69612e-66	669	665
DNAJB11	0.601551	4.44725e-67	6.03709e-66	669	669
EPSTI1	0.601537	4.48604e-67	6.08565e-66	669	669
SEMA3F	0.601486	4.63104e-67	6.27812e-66	669	669
COL18A1	0.601397	4.89992e-67	6.63816e-66	669	669
PLOD2	0.601293	5.22995e-67	7.07573e-66	669	669
DMBX1	0.601256	5.35286e-67	7.23716e-66	669	378
PIM1	0.601065	6.03656e-67	8.15057e-66	669	669
TRADD	0.601046	6.11243e-67	8.24748e-66	669	669
FAM26E	0.600457	8.84944e-67	1.19165e-65	669	669
SHQ1	0.600434	8.9798e-67	1.2084e-65	669	669
DLGAP5	0.600429	9.00822e-67	1.21141e-65	669	652
MYO1F	0.600411	9.11013e-67	1.2243e-65	669	669
FOXS1	0.600169	1.06015e-66	1.42187e-65	669	669
SLC15A3	0.600077	1.12316e-66	1.50437e-65	669	669
GZMK	0.600015	1.16758e-66	1.56284e-65	669	594
STXBP2	0.599866	1.28245e-66	1.71431e-65	669	669
C17orf62	0.599562	1.55064e-66	2.06868e-65	669	669
C14orf142	0.599502	1.61032e-66	2.14546e-65	669	669
ACTA2	0.599481	1.63127e-66	2.17193e-65	669	669
BCAT1	0.599471	1.64139e-66	2.18396e-65	669	669
CEBPB	0.599393	1.72348e-66	2.29016e-65	669	669
RFTN1	0.599172	1.97933e-66	2.62493e-65	669	669
APH1A	0.599147	2.01084e-66	2.66495e-65	669	669
CA9	0.598973	2.24176e-66	2.96709e-65	669	663
SYTL3	0.598716	2.63154e-66	3.4784e-65	669	669
PTTG1	0.598631	2.77566e-66	3.66649e-65	669	669
CDKN3	0.598583	2.86048e-66	3.77358e-65	669	669
PSMA5	0.598462	3.08361e-66	4.05995e-65	669	669
RCN3	0.59845	3.10719e-66	4.08833e-65	669	669
ASF1B	0.598402	3.20034e-66	4.20814e-65	669	669
ICAM3	0.598373	3.25944e-66	4.28305e-65	669	669
MARVELD1	0.598225	3.57496e-66	4.69459e-65	669	669
CRISPLD1	0.597922	4.31747e-66	5.65488e-65	669	669
PHC2	0.59788	4.43189e-66	5.80097e-65	669	669
SIRPB2	0.597696	4.96964e-66	6.49637e-65	669	669
IFITM3	0.597636	5.15612e-66	6.73576e-65	669	669
HCST	0.597611	5.23963e-66	6.84043e-65	669	669
TTF2	0.597415	5.91765e-66	7.71558e-65	669	669
GNPDA1	0.597402	5.96666e-66	7.77444e-65	669	669
HOXB4	0.597311	6.30996e-66	8.21643e-65	669	592
TMEM150B	0.597245	6.57602e-66	8.5518e-65	669	604
GPR183	0.597208	6.72745e-66	8.74307e-65	669	669
MREG	0.597095	7.21551e-66	9.36526e-65	669	669
ZNF321	0.597061	7.37079e-66	9.56064e-65	669	669
TSPAN4	0.596997	7.67167e-66	9.93809e-65	669	669
MAP3K14	0.596991	7.69962e-66	9.96789e-65	669	669
TRIP6	0.596968	7.80854e-66	1.01024e-64	669	669
SWAP70	0.596922	8.03317e-66	1.0373e-64	669	669
PIGC	0.596751	8.93451e-66	1.15221e-64	669	669
IL10RA	0.596647	9.5271e-66	1.22706e-64	669	669
RIOK3	0.596562	1.0046e-65	1.29306e-64	669	669
TWISTNB	0.596535	1.02143e-65	1.31305e-64	669	669
GCH1	0.596376	1.127e-65	1.44691e-64	669	669
HHEX	0.596331	1.15852e-65	1.48643e-64	669	669
HYAL2	0.596181	1.27188e-65	1.63082e-64	669	669
SLAMF7	0.595995	1.42689e-65	1.82842e-64	669	645
CA13	0.595852	1.5588e-65	1.99491e-64	669	669
MAN1C1	0.595706	1.70554e-65	2.18131e-64	669	669
SLC38A6	0.595639	1.77791e-65	2.27243e-64	669	669
CCNB1	0.595595	1.82698e-65	2.33219e-64	669	669
FAM113B	0.595556	1.87074e-65	2.38653e-64	669	669
SGMS2	0.595522	1.91035e-65	2.43551e-64	669	669
CP	0.59542	2.03447e-65	2.59212e-64	669	669
VSIG4	0.595309	2.17881e-65	2.77076e-64	669	669
C7orf68	0.595225	2.29428e-65	2.91207e-64	669	669
G0S2	0.595134	2.42784e-65	3.07966e-64	669	662
LRRC36	0.594998	2.63958e-65	3.34192e-64	669	665
PLAC8	0.59499	2.65238e-65	3.35601e-64	669	659
CRYZ	0.594897	2.80872e-65	3.55159e-64	669	669
DPP4	0.59489	2.82103e-65	3.56491e-64	669	669
MXRA8	0.594779	3.01952e-65	3.81097e-64	669	669
CLEC4A	0.594749	3.07748e-65	3.88168e-64	669	669
RBBP8	0.594741	3.09103e-65	3.89632e-64	669	669
MVP	0.594735	3.10405e-65	3.91029e-64	669	669
ATP1B3	0.594733	3.10766e-65	3.91238e-64	669	669
TCF7	0.594711	3.14944e-65	3.9625e-64	669	669
TSPO	0.594614	3.34321e-65	4.20105e-64	669	669
DTYMK	0.594368	3.89034e-65	4.88551e-64	669	669
C10orf10	0.594353	3.92415e-65	4.92489e-64	669	669
C10orf81	0.594308	4.03546e-65	5.06143e-64	669	585
ITGB3BP	0.594202	4.30584e-65	5.39719e-64	669	669
CD7	0.594195	4.32465e-65	5.41739e-64	669	667
HOXD11	0.594175	4.37882e-65	5.48184e-64	669	346
LRG1	0.594124	4.51923e-65	5.6541e-64	669	668
NFE2L3	0.593927	5.09808e-65	6.37038e-64	669	669
C6orf115	0.593828	5.41864e-65	6.76488e-64	669	669
PLA2G15	0.593827	5.42051e-65	6.76488e-64	669	669
SPAG4	0.593625	6.13781e-65	7.63639e-64	669	659
MRPS15	0.593599	6.23534e-65	7.75294e-64	669	669
TICAM2	0.593532	6.49608e-65	8.06717e-64	669	661
ERP27	0.59353	6.50434e-65	8.07245e-64	669	665
HLA-DQB1	0.593467	6.76187e-65	8.38172e-64	669	669
WWTR1	0.593299	7.494e-65	9.27781e-64	669	669
RNASE6	0.59325	7.72083e-65	9.55275e-64	669	669
PI3	0.593014	8.92368e-65	1.10004e-63	669	499
SEC61B	0.592968	9.17765e-65	1.13065e-63	669	669
CDC20	0.5929	9.56869e-65	1.17811e-63	669	669
HOXC4	0.592777	1.03106e-64	1.26868e-63	669	666
MYL12B	0.5927	1.081e-64	1.32931e-63	669	669
TAP1	0.592136	1.52507e-64	1.86967e-63	669	669
B4GALT1	0.59206	1.59725e-64	1.95697e-63	669	669
CENPL	0.592047	1.61045e-64	1.97194e-63	669	669
STK38	0.592038	1.6195e-64	1.98062e-63	669	669
TNFRSF4	0.591971	1.68683e-64	2.0592e-63	669	668
PRG2	0.591928	1.73169e-64	2.11268e-63	669	528
B3GNT7	0.591847	1.81947e-64	2.21844e-63	669	669
EIF3I	0.591803	1.86898e-64	2.27604e-63	669	669
HN1L	0.59169	2.00183e-64	2.43488e-63	669	669
CDCA2	0.591688	2.00469e-64	2.43688e-63	669	668
FAM46B	0.591629	2.07763e-64	2.52249e-63	669	665
SLC35D2	0.591497	2.25095e-64	2.72635e-63	669	669
GMPPA	0.591461	2.30113e-64	2.78545e-63	669	669
ACAP1	0.591449	2.31843e-64	2.80471e-63	669	668
EPHA2	0.591348	2.46443e-64	2.97954e-63	669	669
PCDH18	0.591271	2.58266e-64	3.12059e-63	669	669
C20orf134	0.591164	2.75656e-64	3.32871e-63	669	664
IFNAR2	0.590885	3.26522e-64	3.94059e-63	669	669
GALM	0.59088	3.2756e-64	3.95075e-63	669	669
LMNA	0.590839	3.35914e-64	4.04908e-63	669	669
CHST2	0.590745	3.55543e-64	4.28056e-63	669	669
UCN2	0.590668	3.72668e-64	4.48405e-63	669	598
PCDH12	0.59049	4.15035e-64	4.98786e-63	669	669
ASCL2	0.590341	4.54362e-64	5.45722e-63	669	667
NCSTN	0.590107	5.23449e-64	6.2683e-63	669	669
C1orf91	0.590075	5.33797e-64	6.38841e-63	669	669
PTGFRN	0.590025	5.4994e-64	6.57379e-63	669	669
GAS2L3	0.589948	5.76238e-64	6.88406e-63	669	658
PLEKHG2	0.589937	5.80278e-64	6.92821e-63	669	669
GPR160	0.589859	6.08315e-64	7.25434e-63	669	669
ZNF530	0.589811	6.26104e-64	7.46206e-63	669	669
MRPS12	0.589447	7.80244e-64	9.28264e-63	669	669
LOC100270710	0.589392	8.06634e-64	9.59093e-63	669	669
CTSW	0.589381	8.12215e-64	9.65159e-63	669	662
C10orf11	0.589338	8.33558e-64	9.89352e-63	669	669
COL8A2	0.589279	8.63612e-64	1.02442e-62	669	669
S100A2	0.588636	1.27308e-63	1.50657e-62	669	668
MOCOS	0.58853	1.35694e-63	1.60487e-62	669	649
ERGIC3	0.588296	1.56217e-63	1.84326e-62	669	669
GTF2E2	0.588239	1.6162e-63	1.90591e-62	669	669
LDLRAD2	0.588221	1.6345e-63	1.92523e-62	669	668
ACTG2	0.588121	1.73497e-63	2.04118e-62	669	657
RPS2P32	0.588116	1.74007e-63	2.04598e-62	669	669
MS4A7	0.588068	1.7917e-63	2.10422e-62	669	669
SIPA1	0.587966	1.90522e-63	2.23364e-62	669	669
LAT2	0.587928	1.94832e-63	2.28284e-62	669	669
TMEM106C	0.587819	2.08119e-63	2.4371e-62	669	669
HOXA10	0.587587	2.39247e-63	2.79673e-62	669	575
PSMC4	0.587274	2.88667e-63	3.37247e-62	669	669
PARP15	0.587178	3.05773e-63	3.57025e-62	669	648
LCK	0.587147	3.11411e-63	3.63186e-62	669	661
CCNA2	0.586848	3.7251e-63	4.33439e-62	669	669
VCL	0.58653	4.50676e-63	5.23481e-62	669	669
C8orf76	0.586323	5.10021e-63	5.91389e-62	669	669
EN1	0.586246	5.33905e-63	6.18727e-62	669	565
KIF2C	0.586245	5.34267e-63	6.1879e-62	669	669
VAV3	0.586173	5.57898e-63	6.45788e-62	669	669
HLA-H	0.586095	5.84527e-63	6.76223e-62	669	669
GRWD1	0.585994	6.20543e-63	7.17476e-62	669	669
GPX1	0.585988	6.22845e-63	7.19724e-62	669	669
FKBP10	0.585974	6.28178e-63	7.2547e-62	669	669
OTP	0.585972	6.28706e-63	7.25663e-62	669	496
HLA-DQB2	0.585929	6.45226e-63	7.44304e-62	669	633
C12orf5	0.585819	6.88929e-63	7.93352e-62	669	669
RHOQ	0.58581	6.9287e-63	7.97435e-62	669	669
RAB20	0.585775	7.07512e-63	8.13532e-62	669	669
HDAC7	0.585266	9.58139e-63	1.09896e-61	669	669
PGCP	0.58522	9.84751e-63	1.12884e-61	669	669
LACTB	0.585174	1.0122e-62	1.15965e-61	669	669
COTL1	0.5851	1.05772e-62	1.21043e-61	669	669
IFI44	0.584667	1.36846e-62	1.56424e-61	669	669
C19orf59	0.584588	1.4342e-62	1.63753e-61	669	397
RHOA	0.584544	1.47166e-62	1.67934e-61	669	669
C20orf20	0.584465	1.54248e-62	1.75783e-61	669	669
TNFSF8	0.584464	1.54306e-62	1.75783e-61	669	666
MX2	0.584349	1.65196e-62	1.87869e-61	669	669
FZD2	0.584268	1.73366e-62	1.96938e-61	669	669
HIST1H2BK	0.584196	1.80947e-62	2.05318e-61	669	669
CASP10	0.58416	1.84805e-62	2.09577e-61	669	669
TGFB2	0.584149	1.86104e-62	2.10932e-61	669	669
ECE1	0.584065	1.95622e-62	2.21595e-61	669	669
SLC37A2	0.58398	2.05703e-62	2.32883e-61	669	669
MRPL36	0.583941	2.10535e-62	2.38086e-61	669	669
TK1	0.583808	2.27812e-62	2.57479e-61	669	669
CDH11	0.58369	2.44259e-62	2.75913e-61	669	669
IL13RA1	0.583637	2.51952e-62	2.84443e-61	669	669
CD72	0.583565	2.62917e-62	2.96656e-61	669	669
FAM136A	0.583534	2.67873e-62	3.02078e-61	669	669
ITPRIP	0.583466	2.789e-62	3.14337e-61	669	669
SERPINB6	0.583243	3.18108e-62	3.57525e-61	669	669
TXNDC17	0.583238	3.1911e-62	3.58451e-61	669	669
ACTL6A	0.583226	3.21341e-62	3.60756e-61	669	669
SNAP23	0.58306	3.54501e-62	3.97539e-61	669	669
NLRC4	0.58295	3.78359e-62	4.24057e-61	669	669
LILRB1	0.582731	4.30573e-62	4.8204e-61	669	669
PTPRC	0.582717	4.34039e-62	4.85651e-61	669	669
SDCBP	0.582637	4.55069e-62	5.08898e-61	669	669
ORAI1	0.582537	4.8284e-62	5.39355e-61	669	669
NMNAT1	0.582528	4.85311e-62	5.41814e-61	669	669
CCDC123	0.582447	5.09148e-62	5.68111e-61	669	669
XRN2	0.582207	5.86391e-62	6.53574e-61	669	669
ELMOD2	0.582173	5.98483e-62	6.66683e-61	669	669
GPR18	0.582084	6.30412e-62	7.01861e-61	669	556
PSRC1	0.582042	6.46354e-62	7.19212e-61	669	669
NFIL3	0.582012	6.57693e-62	7.3102e-61	669	669
C20orf24	0.581973	6.73018e-62	7.47641e-61	669	669
ORC1L	0.581914	6.97031e-62	7.73889e-61	669	669
IL18BP	0.581833	7.30868e-62	8.1101e-61	669	669
CD302	0.581742	7.7096e-62	8.55026e-61	669	669
HOXC10	0.581597	8.39759e-62	9.30814e-61	669	435
SLC2A10	0.581212	1.05305e-61	1.16403e-60	669	669
HLA-DRB5	0.58115	1.09194e-61	1.20635e-60	669	669
LIMS3	0.581091	1.13058e-61	1.24835e-60	669	434
ELTD1	0.581083	1.13589e-61	1.25353e-60	669	669
IL8	0.581002	1.19105e-61	1.31296e-60	669	667
KIF20A	0.580992	1.1979e-61	1.31979e-60	669	668
RAB43	0.580958	1.222e-61	1.3456e-60	669	669
CROT	0.580957	1.22319e-61	1.34618e-60	669	669
FZD1	0.580837	1.31226e-61	1.44263e-60	669	669
TBX19	0.580598	1.50899e-61	1.65799e-60	669	669
ANPEP	0.580536	1.56518e-61	1.71879e-60	669	669
CDC42EP5	0.580436	1.65966e-61	1.81957e-60	669	669
WISP1	0.580406	1.68885e-61	1.85056e-60	669	661
SLC22A18	0.579972	2.17665e-61	2.37859e-60	669	669
GNA15	0.579958	2.19475e-61	2.39577e-60	669	669
SOCS2	0.579655	2.62037e-61	2.85573e-60	669	669
CFH	0.57965	2.62813e-61	2.86263e-60	669	669
SEC61G	0.5796	2.70589e-61	2.94573e-60	669	669
RAG1AP1	0.579298	3.22651e-61	3.5087e-60	669	669
KIF18A	0.578881	4.11454e-61	4.46234e-60	669	668
BCAS4	0.578622	4.78462e-61	5.18068e-60	669	669
DNAJC22	0.578613	4.81097e-61	5.2064e-60	669	669
CKAP4	0.57851	5.10642e-61	5.52317e-60	669	669
ALG14	0.578457	5.26597e-61	5.69268e-60	669	669
HSPB1	0.578284	5.82295e-61	6.2813e-60	669	669
RINL	0.577937	7.12556e-61	7.68232e-60	669	669
GEM	0.57785	7.49247e-61	8.06492e-60	669	669
LRRC8E	0.577724	8.06098e-61	8.6676e-60	669	662
MEMO1	0.577626	8.53362e-61	9.16601e-60	669	669
ARHGAP29	0.577588	8.72213e-61	9.35849e-60	669	669
PKIB	0.577059	1.18509e-60	1.26616e-59	669	669
GPR171	0.576893	1.3049e-60	1.39268e-59	669	608
LOC647946	0.576583	1.56088e-60	1.66411e-59	669	497
BRI3	0.576415	1.72035e-60	1.83218e-59	669	669
ACOT9	0.576319	1.81762e-60	1.93476e-59	669	669
RAP1A	0.576306	1.83135e-60	1.94731e-59	669	669
SPATA17	0.57624	1.9028e-60	2.02115e-59	669	668
RPA3	0.576133	2.02439e-60	2.14803e-59	669	669
MED18	0.575774	2.48914e-60	2.63838e-59	669	669
ZNF90	0.575736	2.54504e-60	2.6948e-59	669	669
POM121L9P	0.57563	2.70435e-60	2.86197e-59	669	669
OSM	0.575625	2.71267e-60	2.86926e-59	669	666
HCLS1	0.57559	2.76839e-60	2.92667e-59	669	669
TOR3A	0.575561	2.81419e-60	2.97353e-59	669	669
PXDNL	0.575529	2.86727e-60	3.02801e-59	669	667
OCIAD2	0.575435	3.02612e-60	3.1941e-59	669	669
CTNNA1	0.575283	3.30344e-60	3.47951e-59	669	669
ZDHHC5	0.575228	3.40778e-60	3.58753e-59	669	669
C1GALT1C1	0.575198	3.46755e-60	3.64855e-59	669	669
KANK2	0.575132	3.60122e-60	3.78523e-59	669	669
OLFML2A	0.575079	3.71419e-60	3.90194e-59	669	669
CXCL16	0.57496	3.97588e-60	4.17468e-59	669	669
PSMA7	0.574899	4.11863e-60	4.3223e-59	669	669
SAMSN1	0.574704	4.60503e-60	4.82772e-59	669	669
PIK3AP1	0.574613	4.85471e-60	5.08682e-59	669	669
DNPEP	0.574495	5.19369e-60	5.43635e-59	669	669
ARFIP1	0.574405	5.4676e-60	5.71711e-59	669	669
CD86	0.574318	5.74876e-60	6.00797e-59	669	669
PRMT6	0.57426	5.94332e-60	6.20808e-59	669	669
JAK3	0.574144	6.35177e-60	6.62785e-59	669	669
C1orf112	0.574037	6.75066e-60	7.04043e-59	669	669
LAPTM4A	0.573948	7.1047e-60	7.40199e-59	669	669
PODNL1	0.5739	7.30429e-60	7.60599e-59	669	669
DMP1	0.57387	7.42814e-60	7.73095e-59	669	465
PTGER2	0.57381	7.69153e-60	8.00094e-59	669	625
MAP3K8	0.573781	7.81683e-60	8.12708e-59	669	669
NRAS	0.573747	7.97372e-60	8.28592e-59	669	669
FAM177B	0.573323	1.01569e-59	1.05383e-58	669	652
TCTN1	0.573086	1.16297e-59	1.20539e-58	669	669
HAS2	0.573085	1.16372e-59	1.20554e-58	669	669
CLEC18A	0.572981	1.2351e-59	1.27817e-58	669	669
PDIA3	0.572899	1.29413e-59	1.3372e-58	669	669
OSTM1	0.572856	1.32608e-59	1.36951e-58	669	669
H19	0.572702	1.448e-59	1.49313e-58	669	668
HAT1	0.572464	1.65804e-59	1.70883e-58	669	669
PION	0.572431	1.69029e-59	1.74118e-58	669	669
HOXA6	0.572261	1.86163e-59	1.91669e-58	669	288
RAET1K	0.57219	1.93806e-59	1.99131e-58	669	359
EVC2	0.572158	1.97454e-59	2.02776e-58	669	667
BOLA3	0.571998	2.16173e-59	2.21773e-58	669	669
HAUS1	0.571968	2.19893e-59	2.25474e-58	669	669
GZMH	0.571812	2.4028e-59	2.45878e-58	669	609
CD101	0.571789	2.43504e-59	2.4905e-58	669	669
C6orf153	0.571747	2.49365e-59	2.54915e-58	669	669
MICALL2	0.571647	2.63942e-59	2.69543e-58	669	669
ZMPSTE24	0.571562	2.77021e-59	2.82325e-58	669	669
TRAPPC3	0.571452	2.94852e-59	2.99891e-58	669	669
CCL7	0.571294	3.22595e-59	3.27611e-58	669	223
MPV17	0.57116	3.48088e-59	3.53144e-58	669	669
HOXA2	0.571046	3.71169e-59	3.75991e-58	669	375
C1orf38	0.570888	4.05953e-59	4.10606e-58	669	669
TMBIM4	0.570767	4.34932e-59	4.39476e-58	669	669
TREM2	0.570736	4.4268e-59	4.46856e-58	669	669
LRRC59	0.570573	4.85376e-59	4.89709e-58	669	669
SLC35A4	0.570544	4.93436e-59	4.97342e-58	669	669
POFUT1	0.570494	5.07651e-59	5.11414e-58	669	669
CD180	0.570474	5.1321e-59	5.16755e-58	669	669
NFKB1	0.570435	5.24858e-59	5.28218e-58	669	669
EFNA4	0.570415	5.30779e-59	5.33911e-58	669	669
GFI1	0.570219	5.92944e-59	5.95252e-58	669	662
ARL4C	0.570116	6.28634e-59	6.30766e-58	669	669
SLC1A5	0.569992	6.7404e-59	6.75652e-58	669	669
PL-5283	0.569887	7.15258e-59	7.15899e-58	669	669
NCKAP1L	0.569827	7.40069e-59	7.39995e-58	669	669
SFRS9	0.569518	8.80891e-59	8.79929e-58	669	669
CECR1	0.569348	9.69654e-59	9.68114e-58	669	669
FEM1C	0.569224	1.03946e-58	1.03678e-57	669	669
RNASE3	0.569047	1.14833e-58	1.14423e-57	669	651
ZNF613	0.568984	1.1898e-58	1.1838e-57	669	669
ACTG1	0.568958	1.20799e-58	1.2013e-57	669	669
PLEKHO2	0.568834	1.2948e-58	1.28573e-57	669	669
ETV7	0.568689	1.40495e-58	1.39373e-57	669	667
SNRPD2	0.568498	1.56432e-58	1.55029e-57	669	669
FTSJ2	0.568266	1.78244e-58	1.76559e-57	669	669
STAC3	0.568249	1.79911e-58	1.78122e-57	669	669
APCDD1L	0.568197	1.8521e-58	1.83279e-57	669	497
PAFAH2	0.568134	1.91956e-58	1.89861e-57	669	669
HGF	0.568112	1.94288e-58	1.92073e-57	669	669
TGFBR2	0.567841	2.26196e-58	2.23288e-57	669	669
FKBP1A	0.567683	2.47093e-58	2.43558e-57	669	669
AP1S2	0.567651	2.5166e-58	2.47939e-57	669	669
TNFRSF19	0.567267	3.11994e-58	3.06629e-57	669	669
DPH3	0.56721	3.22025e-58	3.16333e-57	669	669
FLNC	0.567162	3.30915e-58	3.24907e-57	669	669
CKS1B	0.567131	3.36559e-58	3.30287e-57	669	669
SPRY2	0.567032	3.55736e-58	3.48767e-57	669	669
NR5A2	0.566914	3.80037e-58	3.72048e-57	669	664
TAF12	0.566624	4.46855e-58	4.37036e-57	669	669
P2RY10	0.566443	4.94351e-58	4.83019e-57	669	420
EFNB1	0.566402	5.05884e-58	4.94048e-57	669	669
TRAT1	0.566219	5.60368e-58	5.46991e-57	669	457
SGSH	0.566127	5.89721e-58	5.75085e-57	669	669
TRIM5	0.566045	6.1724e-58	6.01339e-57	669	669
KCNQ1	0.56601	6.2948e-58	6.12966e-57	669	669
C15orf54	0.565947	6.51897e-58	6.34488e-57	669	293
HOXC9	0.565688	7.53297e-58	7.31057e-57	669	351
SLC35B1	0.565576	8.01714e-58	7.7767e-57	669	669
SLC25A39	0.565401	8.83376e-58	8.5647e-57	669	669
HSPC157	0.565278	9.45805e-58	9.16556e-57	669	669
MEST	0.565181	9.98726e-58	9.66909e-57	669	669
ATP6V0E1	0.565178	1.00037e-57	9.6803e-57	669	669
GMPPB	0.565135	1.02434e-57	9.90278e-57	669	669
PLS3	0.564954	1.13262e-57	1.09391e-56	669	669
ERMAP	0.564946	1.13746e-57	1.09806e-56	669	669
CPSF4	0.564604	1.37549e-57	1.3234e-56	669	669
C7orf42	0.564563	1.40676e-57	1.35219e-56	669	669
DRAM2	0.564504	1.45344e-57	1.39639e-56	669	669
AOX1	0.564208	1.71251e-57	1.64293e-56	669	665
HMGN4	0.564201	1.71951e-57	1.64887e-56	669	669
RASSF1	0.564066	1.8528e-57	1.77414e-56	669	669
NUDT16P1	0.563835	2.10545e-57	2.01223e-56	669	669
SHMT1	0.56382	2.1237e-57	2.02871e-56	669	669
ALPK1	0.563787	2.1629e-57	2.0642e-56	669	669
POLR2L	0.563782	2.16801e-57	2.06809e-56	669	669
KIF23	0.563612	2.38179e-57	2.26879e-56	669	669
TFEC	0.56297	3.39526e-57	3.22198e-56	669	669
VENTX	0.562966	3.40279e-57	3.22759e-56	669	668
ZNF468	0.562895	3.5378e-57	3.35092e-56	669	669
ASL	0.562875	3.57772e-57	3.38714e-56	669	669
MUTED	0.562832	3.66385e-57	3.46704e-56	669	669
PSTPIP2	0.562667	4.01311e-57	3.79041e-56	669	669
BST2	0.562653	4.04323e-57	3.81707e-56	669	669
OBFC2A	0.562646	4.05847e-57	3.82965e-56	669	669
RER1	0.562398	4.65326e-57	4.3827e-56	669	669
IL18	0.562374	4.71444e-57	4.43824e-56	669	669
PARP12	0.562367	4.73237e-57	4.45303e-56	669	669
HOXD10	0.562358	4.75739e-57	4.47449e-56	669	473
EPHB4	0.562258	5.02541e-57	4.72435e-56	669	669
ITGAL	0.56196	5.92213e-57	5.56216e-56	669	669
C17orf44	0.561756	6.62348e-57	6.21218e-56	669	669
PPPDE1	0.561721	6.75159e-57	6.32938e-56	669	669
SLC12A7	0.561681	6.90193e-57	6.4643e-56	669	669
ATP8B3	0.56148	7.70527e-57	7.20998e-56	669	669
POLE2	0.561442	7.86877e-57	7.35955e-56	669	668
JUN	0.561041	9.80181e-57	9.15472e-56	669	669
TNFAIP2	0.561026	9.8838e-57	9.22702e-56	669	669
S100A16	0.561012	9.95806e-57	9.29203e-56	669	669
C7orf49	0.561011	9.96476e-57	9.29398e-56	669	669
CYBB	0.560827	1.1024e-56	1.02677e-55	669	669
APOBEC3B	0.5607	1.18159e-56	1.0995e-55	669	662
FAM3D	0.560595	1.25168e-56	1.16418e-55	669	473
PNO1	0.560583	1.25941e-56	1.17083e-55	669	669
CSTB	0.56046	1.34771e-56	1.25235e-55	669	669
PRKD2	0.56044	1.36206e-56	1.26509e-55	669	669
CITED1	0.560282	1.48533e-56	1.37895e-55	669	669
ETF1	0.560208	1.54634e-56	1.433e-55	669	669
LAMC3	0.56009	1.64912e-56	1.52748e-55	669	669
LOC283314	0.560087	1.65242e-56	1.52984e-55	669	664
PPIH	0.56002	1.71374e-56	1.58588e-55	669	669
ADAMTS7	0.559939	1.79066e-56	1.6563e-55	669	669
CKM	0.559861	1.86899e-56	1.72716e-55	669	587
PSMD8	0.559827	1.90374e-56	1.75847e-55	669	669
CD52	0.559819	1.91171e-56	1.76502e-55	669	668
IRAK2	0.559764	1.97043e-56	1.81757e-55	669	669
POP4	0.559448	2.34084e-56	2.1543e-55	669	669
DEGS1	0.559403	2.39882e-56	2.20463e-55	669	669
MELK	0.5591	2.8298e-56	2.59717e-55	669	667
CCNB2	0.558958	3.05731e-56	2.80214e-55	669	669
ILK	0.558921	3.11926e-56	2.85762e-55	669	669
LOC440957	0.558583	3.74901e-56	3.4283e-55	669	669
PPP1R15A	0.558577	3.76107e-56	3.43777e-55	669	669
RRM2	0.558475	3.97535e-56	3.63198e-55	669	668
GNG10	0.558317	4.3303e-56	3.95267e-55	669	669
RAD54B	0.558229	4.54253e-56	4.14264e-55	669	669
FBXO4	0.558206	4.59952e-56	4.19272e-55	669	669
IPO4	0.558146	4.75097e-56	4.32685e-55	669	669
TRAPPC2P1	0.557907	5.41003e-56	4.91817e-55	669	669
P2RY8	0.557904	5.41792e-56	4.92311e-55	669	668
PDK3	0.557761	5.85322e-56	5.31386e-55	669	669
PNP	0.557717	5.99546e-56	5.44053e-55	669	669
TMEM107	0.557499	6.74699e-56	6.11699e-55	669	669
PPCS	0.557496	6.75965e-56	6.1257e-55	669	669
PSMA3	0.557479	6.8219e-56	6.17933e-55	669	669
JUNB	0.557402	7.1112e-56	6.43848e-55	669	669
NEU1	0.55735	7.31285e-56	6.61511e-55	669	669
E2F8	0.557306	7.48803e-56	6.77053e-55	669	655
ZAK	0.557219	7.84854e-56	7.09163e-55	669	669
KMO	0.557138	8.20214e-56	7.40622e-55	669	653
SMS	0.557091	8.41397e-56	7.59068e-55	669	669
AEBP1	0.557083	8.45177e-56	7.61795e-55	669	669
NCF1B	0.557081	8.45786e-56	7.62003e-55	669	667
FAM159A	0.557017	8.7543e-56	7.88358e-55	669	666
STK3	0.55681	9.79119e-56	8.8055e-55	669	669
FAM120AOS	0.556804	9.8265e-56	8.83331e-55	669	669
XKR8	0.556499	1.15837e-55	1.04036e-54	669	669
IFRD2	0.556474	1.17398e-55	1.05391e-54	669	669
TTC38	0.556182	1.37451e-55	1.23283e-54	669	669
NLRP12	0.55598	1.53177e-55	1.37266e-54	669	626
C17orf91	0.555908	1.59239e-55	1.42571e-54	669	669
C1orf174	0.555879	1.61802e-55	1.44801e-54	669	669
CDKN2C	0.555878	1.61889e-55	1.44814e-54	669	669
MYL9	0.555649	1.83125e-55	1.63666e-54	669	669
CYR61	0.555633	1.84711e-55	1.64936e-54	669	669
CARD6	0.555626	1.85375e-55	1.65456e-54	669	669
AIF1	0.555332	2.17128e-55	1.93368e-54	669	669
DCTD	0.555093	2.46887e-55	2.19579e-54	669	669
PIK3CG	0.555075	2.49295e-55	2.21622e-54	669	669
SKA1	0.554812	2.86991e-55	2.54909e-54	669	669
SNAPC2	0.554715	3.02323e-55	2.6829e-54	669	669
ICOS	0.554647	3.13658e-55	2.78104e-54	669	470
ARAF	0.554554	3.29691e-55	2.92191e-54	669	669
CENPW	0.554524	3.34935e-55	2.96707e-54	669	669
CXCR2	0.554465	3.45646e-55	3.06061e-54	669	669
KRT7	0.554452	3.48142e-55	3.08136e-54	669	590
MAPKAPK3	0.554433	3.51615e-55	3.11073e-54	669	669
MMP1	0.554431	3.52052e-55	3.11323e-54	669	432
NME2	0.554426	3.53035e-55	3.12054e-54	669	669
DYNLT1	0.554373	3.63183e-55	3.20884e-54	669	669
PSMA2	0.554221	3.93938e-55	3.47751e-54	669	669
EIF5AL1	0.554153	4.08593e-55	3.60371e-54	669	669
LASS2	0.554122	4.15462e-55	3.66109e-54	669	669
CACNA2D4	0.554056	4.30296e-55	3.79015e-54	669	669
PMFBP1	0.554011	4.40837e-55	3.88129e-54	669	667
VAT1	0.553923	4.62086e-55	4.0666e-54	669	669
ARHGAP30	0.553881	4.72473e-55	4.15438e-54	669	669
SPHK1	0.553552	5.63569e-55	4.9532e-54	669	669
DDX60L	0.553511	5.75918e-55	5.05953e-54	669	669
NAPSB	0.553228	6.69686e-55	5.8756e-54	669	668
SLC16A4	0.552974	7.66822e-55	6.71612e-54	669	669
DDX47	0.552971	7.68053e-55	6.72397e-54	669	669
TMEM176A	0.552853	8.18104e-55	7.15903e-54	669	669
CCR4	0.552794	8.44298e-55	7.38503e-54	669	413
NDC80	0.552746	8.66112e-55	7.57255e-54	669	668
HOXD13	0.552648	9.1248e-55	7.97449e-54	669	380
RPF1	0.552592	9.39864e-55	8.21024e-54	669	669
PITX1	0.552581	9.45648e-55	8.25718e-54	669	631
TRNAU1AP	0.552495	9.89673e-55	8.63784e-54	669	669
RAD51	0.552421	1.02973e-54	8.98353e-54	669	669
ADAMTS1	0.552192	1.16296e-54	1.01415e-53	669	669
TRIM6	0.552178	1.17161e-54	1.02125e-53	669	669
SYNGR2	0.552152	1.18792e-54	1.03502e-53	669	669
CENPK	0.552125	1.20502e-54	1.04946e-53	669	667
NAALADL1	0.551951	1.32164e-54	1.14805e-53	669	669
C4orf6	0.551916	1.34689e-54	1.16947e-53	669	413
SLC47A2	0.551875	1.37677e-54	1.1949e-53	669	667
C1orf84	0.551613	1.58216e-54	1.37139e-53	669	664
ZBTB8OS	0.5516	1.59311e-54	1.38028e-53	669	669
ARSJ	0.551555	1.63144e-54	1.41227e-53	669	669
CD226	0.55149	1.68852e-54	1.45981e-53	669	668
IMPA2	0.551478	1.69945e-54	1.46863e-53	669	669
CCDC46	0.551379	1.79068e-54	1.5468e-53	669	669
NADK	0.551278	1.88944e-54	1.6314e-53	669	669
RAI14	0.551209	1.96006e-54	1.69165e-53	669	669
TFPI2	0.551102	2.07445e-54	1.78962e-53	669	636
TCF19	0.551095	2.08143e-54	1.79486e-53	669	669
STAT5A	0.55097	2.22425e-54	1.91638e-53	669	669
ARSD	0.550938	2.2623e-54	1.94833e-53	669	669
EDARADD	0.550903	2.30491e-54	1.98418e-53	669	669
SLC35C1	0.550859	2.35911e-54	2.02823e-53	669	669
2020-09-09	0.55079	2.44617e-54	2.10218e-53	669	669
AFAP1L1	0.550617	2.68132e-54	2.30033e-53	669	669
IRF7	0.550571	2.74659e-54	2.35533e-53	669	669
DMRTA2	0.550438	2.94771e-54	2.52671e-53	669	654
GALNS	0.550306	3.16017e-54	2.70653e-53	669	669
GPR39	0.550193	3.35359e-54	2.87096e-53	669	669
TRIAP1	0.550024	3.66717e-54	3.13407e-53	669	669
GANAB	0.550021	3.67349e-54	3.13814e-53	669	669
LITAF	0.54997	3.77336e-54	3.22209e-53	669	669
C1orf212	0.549945	3.8236e-54	3.26361e-53	669	669
TBC1D1	0.54989	3.93593e-54	3.35806e-53	669	669
TBXA2R	0.549786	4.15915e-54	3.5455e-53	669	669
STIL	0.549734	4.27403e-54	3.64189e-53	669	669
B4GALT5	0.549468	4.91809e-54	4.18714e-53	669	669
ZNF816A	0.549366	5.18817e-54	4.41148e-53	669	669
TM4SF18	0.549164	5.77096e-54	4.90288e-53	669	669
DUSP5	0.549138	5.84908e-54	4.96715e-53	669	669
OASL	0.548979	6.3616e-54	5.39783e-53	669	669
RBP1	0.548847	6.8183e-54	5.78291e-53	669	669
CUBN	0.54882	6.91303e-54	5.86078e-53	669	669
LEFTY2	0.54877	7.09884e-54	6.01324e-53	669	664
MBOAT1	0.548755	7.15574e-54	6.05888e-53	669	669
LGALS9	0.54865	7.56081e-54	6.39918e-53	669	669
SP6	0.548619	7.68485e-54	6.50142e-53	669	669
CD274	0.548572	7.8755e-54	6.65991e-53	669	664
HEATR3	0.548482	8.25819e-54	6.9806e-53	669	669
TMX1	0.548111	1.0033e-53	8.45951e-53	669	669
SLAMF9	0.548084	1.01782e-53	8.57832e-53	669	555
SCIN	0.548013	1.05606e-53	8.89694e-53	669	669
CD79B	0.547923	1.10696e-53	9.32184e-53	669	661
MOV10	0.547911	1.1142e-53	9.37755e-53	669	669
UBE2C	0.547911	1.11451e-53	9.37755e-53	669	668
SNRPB	0.547804	1.17833e-53	9.90214e-53	669	669
CD200R1	0.547669	1.265e-53	1.06172e-52	669	644
COMMD10	0.547458	1.41264e-53	1.18464e-52	669	669
KRT75	0.547445	1.42195e-53	1.19195e-52	669	387
NDUFA4L2	0.547424	1.43771e-53	1.20466e-52	669	669
AP2S1	0.547393	1.46115e-53	1.22379e-52	669	669
ADPRHL2	0.547379	1.47209e-53	1.23243e-52	669	669
ALDH3B1	0.547289	1.54305e-53	1.29131e-52	669	669
SLC17A9	0.546974	1.819e-53	1.51845e-52	669	669
TNFAIP8L2	0.546821	1.97089e-53	1.64456e-52	669	669
P4HA2	0.546684	2.11693e-53	1.7635e-52	669	669
TCTEX1D4	0.546534	2.28925e-53	1.90311e-52	669	535
PTPN9	0.546528	2.2966e-53	1.90781e-52	669	669
COPB1	0.546527	2.2968e-53	1.90781e-52	669	669
PHTF1	0.546512	2.3153e-53	1.92237e-52	669	669
PTPLAD2	0.546398	2.45751e-53	2.03877e-52	669	669
DCLRE1B	0.546367	2.49739e-53	2.07015e-52	669	669
M6PR	0.546238	2.67036e-53	2.21032e-52	669	669
SAMD9L	0.546238	2.67088e-53	2.21032e-52	669	669
C20orf195	0.546181	2.7517e-53	2.27627e-52	669	553
CXorf21	0.546167	2.77107e-53	2.29135e-52	669	669
ZNF35	0.546158	2.78525e-53	2.30212e-52	669	669
ZNF20	0.546106	2.86134e-53	2.36307e-52	669	669
TFPI	0.54607	2.91585e-53	2.4071e-52	669	669
E2F7	0.545913	3.16357e-53	2.60839e-52	669	668
FBXL12	0.545805	3.34578e-53	2.7575e-52	669	669
TDO2	0.545451	4.02311e-53	3.31302e-52	669	653
HSP90B1	0.545306	4.33769e-53	3.56914e-52	669	669
CCDC18	0.545232	4.50806e-53	3.7063e-52	669	669
KCNK13	0.545049	4.95632e-53	4.06819e-52	669	669
LYPLA2P1	0.544997	5.09335e-53	4.17896e-52	669	669
LOC493754	0.544833	5.54359e-53	4.54281e-52	669	669
PXN	0.544819	5.58566e-53	4.57542e-52	669	669
ZAP70	0.544732	5.84384e-53	4.78301e-52	669	666
ARPC4	0.544698	5.9465e-53	4.86505e-52	669	669
CDC6	0.544302	7.299e-53	5.96188e-52	669	669
SLC4A2	0.544238	7.5448e-53	6.16016e-52	669	669
FASLG	0.544213	7.64567e-53	6.23998e-52	669	466
RPAP2	0.543935	8.82833e-53	7.19937e-52	669	669
TRIM34	0.543775	9.58627e-53	7.80796e-52	669	669
SDF2L1	0.543658	1.01845e-52	8.29185e-52	669	669
KLRB1	0.543378	1.17697e-52	9.57476e-52	669	554
PSMD9	0.543351	1.19344e-52	9.70482e-52	669	669
RAD51AP1	0.543243	1.2617e-52	1.02391e-51	669	669
EML4	0.542942	1.47405e-52	1.1948e-51	669	669
IGSF6	0.5429	1.50584e-52	1.22008e-51	669	669
ZFP36	0.542843	1.55109e-52	1.25623e-51	669	669
OAZ1	0.542725	1.64839e-52	1.33343e-51	669	669
OIP5	0.542632	1.72901e-52	1.39752e-51	669	669
ATP8B1	0.542275	2.07722e-52	1.67694e-51	669	669
BIRC5	0.542207	2.15171e-52	1.73638e-51	669	666
GNLY	0.542159	2.20477e-52	1.77707e-51	669	667
EPS8L1	0.542023	2.36536e-52	1.90574e-51	669	668
ANKRD53	0.541929	2.48214e-52	1.99823e-51	669	669
FAM86C	0.541823	2.62006e-52	2.10758e-51	669	669
LENG9	0.541779	2.68039e-52	2.15524e-51	669	669
GALNT4	0.541467	3.14548e-52	2.52618e-51	669	669
RGS3	0.541308	3.41332e-52	2.73691e-51	669	669
BTK	0.541191	3.62408e-52	2.90475e-51	669	669
GPR157	0.541028	3.94049e-52	3.15584e-51	669	569
GLB1L	0.540951	4.09817e-52	3.28082e-51	669	669
MDK	0.540784	4.46374e-52	3.57206e-51	669	669
ABCD1	0.540638	4.81072e-52	3.8482e-51	669	669
FLOT1	0.540547	5.03945e-52	4.02956e-51	669	669
PLIN3	0.540253	5.85621e-52	4.67706e-51	669	669
STBD1	0.54025	5.86571e-52	4.68279e-51	669	669
TMEM159	0.540229	5.92772e-52	4.72854e-51	669	669
GNB2	0.540198	6.02198e-52	4.79993e-51	669	669
CD3G	0.540179	6.07991e-52	4.84419e-51	669	484
AREG	0.540115	6.28282e-52	5.00387e-51	669	462
CEPT1	0.540101	6.32675e-52	5.03687e-51	669	669
TWIST1	0.540088	6.36863e-52	5.0682e-51	669	669
TTC4	0.540046	6.5073e-52	5.17651e-51	669	669
DUSP23	0.540043	6.51688e-52	5.18208e-51	669	669
HLA-F	0.539869	7.12365e-52	5.6601e-51	669	669
PAX3	0.539819	7.30608e-52	5.80276e-51	669	355
ZNF416	0.539676	7.85915e-52	6.23464e-51	669	669
KCNMB1	0.539569	8.30244e-52	6.57851e-51	669	669
CAPZA2	0.539501	8.59246e-52	6.80563e-51	669	669
PPIA	0.539014	1.10098e-51	8.70656e-51	669	669
CEACAM4	0.538844	1.20035e-51	9.48119e-51	669	629
VAV1	0.538763	1.25059e-51	9.87413e-51	669	669
ZNF765	0.538662	1.31669e-51	1.0392e-50	669	669
ERCC6L	0.538628	1.33961e-51	1.05687e-50	669	669
HOXC8	0.53843	1.48166e-51	1.16803e-50	669	374
PQLC2	0.538269	1.60765e-51	1.26536e-50	669	669
QPCTL	0.538254	1.61939e-51	1.27411e-50	669	669
ECM2	0.53825	1.62305e-51	1.27649e-50	669	669
VSTM1	0.538244	1.62805e-51	1.27992e-50	669	403
UBD	0.53819	1.67303e-51	1.31425e-50	669	668
IRX5	0.53806	1.78678e-51	1.40251e-50	669	628
RNASET2	0.537969	1.87149e-51	1.46843e-50	669	669
BUB1	0.537957	1.88315e-51	1.47701e-50	669	669
TMEM140	0.537859	1.97931e-51	1.55182e-50	669	669
POC1A	0.537783	2.05664e-51	1.61182e-50	669	669
IL7R	0.537744	2.09743e-51	1.64251e-50	669	626
HMGN2	0.53771	2.13361e-51	1.67019e-50	669	669
ROD1	0.537674	2.1735e-51	1.70076e-50	669	669
LY9	0.537648	2.20193e-51	1.72233e-50	669	558
BTN2A3	0.53754	2.32593e-51	1.81791e-50	669	669
NIPA2	0.537458	2.42479e-51	1.89444e-50	669	669
DUSP6	0.53734	2.5729e-51	2.0086e-50	669	669
MLF1IP	0.53725	2.69299e-51	2.10072e-50	669	669
HBXIP	0.537137	2.85177e-51	2.22371e-50	669	669
ZNF101	0.537117	2.88053e-51	2.24527e-50	669	669
C7orf30	0.537082	2.93129e-51	2.28395e-50	669	669
CTNNAL1	0.537048	2.98312e-51	2.32344e-50	669	669
FAM54A	0.536967	3.10763e-51	2.41854e-50	669	669
TMEM61	0.536855	3.28771e-51	2.55671e-50	669	545
KIF4A	0.536734	3.49582e-51	2.7175e-50	669	669
ULBP3	0.536694	3.56655e-51	2.77034e-50	669	643
RDH5	0.536632	3.67962e-51	2.85707e-50	669	669
SLC10A6	0.536611	3.71953e-51	2.88583e-50	669	605
TRAF3IP3	0.536547	3.84147e-51	2.97814e-50	669	669
ZWILCH	0.536421	4.09345e-51	3.17105e-50	669	669
DHRSX	0.536418	4.09993e-51	3.17484e-50	669	669
EPHA1	0.536282	4.39048e-51	3.39591e-50	669	579
GGH	0.536153	4.68544e-51	3.61849e-50	669	669
TOR1A	0.536147	4.69907e-51	3.62763e-50	669	669
LPXN	0.536057	4.91714e-51	3.79306e-50	669	669
PLA2G4A	0.535908	5.30142e-51	4.08636e-50	669	669
ULK4	0.535682	5.93889e-51	4.57597e-50	669	669
FAM105B	0.535645	6.04948e-51	4.65761e-50	669	669
TMEM87B	0.535499	6.51173e-51	5.00968e-50	669	669
SLC16A5	0.535448	6.67882e-51	5.13626e-50	669	669
GCNT1	0.535326	7.10185e-51	5.45741e-50	669	669
SLC35D1	0.5352	7.56617e-51	5.80756e-50	669	669
GCLM	0.535107	7.92594e-51	6.08139e-50	669	669
MYO1B	0.535075	8.05574e-51	6.17863e-50	669	669
CYFIP1	0.53497	8.4938e-51	6.50717e-50	669	669
C6orf141	0.534954	8.55872e-51	6.55441e-50	669	628
RASSF5	0.534869	8.93223e-51	6.83785e-50	669	669
DAP3	0.534696	9.74357e-51	7.45327e-50	669	669
APLN	0.534665	9.89752e-51	7.56816e-50	669	669
TMEM64	0.534468	1.09193e-50	8.34314e-50	669	669
KIAA0101	0.534322	1.17476e-50	8.96921e-50	669	669
PDLIM4	0.534187	1.25736e-50	9.59259e-50	669	669
IDH1	0.534098	1.31467e-50	1.0026e-49	669	669
ARL2BP	0.534074	1.33049e-50	1.01428e-49	669	669
UBE2F	0.534069	1.33363e-50	1.01629e-49	669	669
IL1R2	0.533773	1.54629e-50	1.17612e-49	669	623
MYBL2	0.533753	1.56168e-50	1.18737e-49	669	668
GCOM1	0.533634	1.65795e-50	1.2601e-49	669	669
RNF144B	0.533626	1.66426e-50	1.26394e-49	669	669
UACA	0.533479	1.79082e-50	1.358e-49	669	669
COMMD1	0.533229	2.02918e-50	1.53643e-49	669	669
ACP2	0.533137	2.12414e-50	1.60652e-49	669	669
SERF2	0.533001	2.27345e-50	1.71815e-49	669	669
SNX8	0.532755	2.56919e-50	1.9402e-49	669	669
ZNF410	0.532735	2.59503e-50	1.95898e-49	669	669
HLA-DQA2	0.532674	2.67593e-50	2.0193e-49	669	664
SUMF2	0.532666	2.68552e-50	2.02577e-49	669	669
CLEC10A	0.532639	2.72189e-50	2.05167e-49	669	626
TRIM22	0.532501	2.91575e-50	2.19697e-49	669	669
CHST12	0.532394	3.07568e-50	2.31574e-49	669	669
F3	0.532346	3.1491e-50	2.37013e-49	669	669
HOXB9	0.532255	3.29564e-50	2.47949e-49	669	349
EMB	0.532219	3.35535e-50	2.52347e-49	669	669
TNFSF13B	0.532095	3.56889e-50	2.68207e-49	669	669
C2orf66	0.531968	3.80144e-50	2.85372e-49	669	637
TTYH3	0.531968	3.80155e-50	2.85372e-49	669	669
GLIS3	0.531918	3.89603e-50	2.92355e-49	669	669
LOXL4	0.531752	4.23161e-50	3.173e-49	669	668
KCNK6	0.531649	4.45345e-50	3.33809e-49	669	669
TMEM150A	0.531582	4.60294e-50	3.44886e-49	669	669
PDGFA	0.531537	4.70703e-50	3.52554e-49	669	669
MIPEP	0.531511	4.76865e-50	3.57036e-49	669	669
QTRTD1	0.531372	5.10901e-50	3.82378e-49	669	669
ALG12	0.531324	5.23207e-50	3.91442e-49	669	669
C19orf69	0.531302	5.28838e-50	3.95508e-49	669	525
IER3	0.531205	5.5486e-50	4.14815e-49	669	669
CCR7	0.531189	5.59356e-50	4.18021e-49	669	660
RNF149	0.531149	5.70697e-50	4.26338e-49	669	669
KCTD14	0.531094	5.86277e-50	4.37652e-49	669	669
FGFRL1	0.531045	6.00799e-50	4.48326e-49	669	669
EFEMP1	0.530942	6.32079e-50	4.71493e-49	669	669
PALM2-AKAP2	0.53087	6.54995e-50	4.88225e-49	669	669
LY86	0.530866	6.56451e-50	4.89129e-49	669	669
HOXC5	0.530828	6.68711e-50	4.97711e-49	669	439
SVIL	0.530389	8.30836e-50	6.17692e-49	669	669
CCL26	0.530333	8.5413e-50	6.34776e-49	669	563
SFT2D2	0.530286	8.74245e-50	6.49486e-49	669	669
C5orf39	0.530282	8.75985e-50	6.50538e-49	669	669
TMEM45A	0.530269	8.81575e-50	6.54447e-49	669	669
C3orf52	0.53026	8.85566e-50	6.57167e-49	669	631
RARRES1	0.530244	8.92853e-50	6.62331e-49	669	669
LPCAT3	0.5302	9.1252e-50	6.76671e-49	669	669
KLHDC8A	0.53016	9.30326e-50	6.8962e-49	669	669
C3orf38	0.529961	1.0266e-49	7.60148e-49	669	669
GJA4	0.52987	1.07366e-49	7.94404e-49	669	669
PLK1	0.529843	1.08818e-49	8.04854e-49	669	669
ZNF345	0.529685	1.17616e-49	8.6961e-49	669	669
ALG8	0.529633	1.20656e-49	8.91427e-49	669	669
CARM1	0.5296	1.22663e-49	9.05921e-49	669	669
NUP85	0.529595	1.22947e-49	9.07685e-49	669	669
HAPLN3	0.529485	1.29803e-49	9.57253e-49	669	669
SNRPC	0.529445	1.32361e-49	9.75753e-49	669	669
ZNF788	0.529199	1.49466e-49	1.10024e-48	669	669
FZD6	0.529079	1.58511e-49	1.16639e-48	669	669
TACC3	0.52898	1.66446e-49	1.22389e-48	669	669
PELO	0.528812	1.80777e-49	1.3283e-48	669	669
AMICA1	0.528803	1.81551e-49	1.33349e-48	669	669
ROBLD3	0.528774	1.84181e-49	1.35232e-48	669	669
CTTNBP2NL	0.528769	1.84612e-49	1.35499e-48	669	669
CD40LG	0.528654	1.95377e-49	1.43191e-48	669	494
PUSL1	0.528408	2.20473e-49	1.61466e-48	669	669
FLJ35776	0.52829	2.33604e-49	1.71021e-48	669	669
GPR132	0.52802	2.6666e-49	1.95008e-48	669	669
TMOD3	0.527981	2.71811e-49	1.98703e-48	669	669
KRTCAP2	0.527946	2.76488e-49	2.01975e-48	669	669
UTP11L	0.527904	2.82207e-49	2.06003e-48	669	669
WARS2	0.527774	3.00887e-49	2.194e-48	669	669
C11orf82	0.527694	3.12788e-49	2.27995e-48	669	669
WDR41	0.527609	3.26172e-49	2.37493e-48	669	669
DSG2	0.527415	3.58671e-49	2.60873e-48	669	611
MRPL37	0.527317	3.76208e-49	2.7343e-48	669	669
MFSD10	0.527302	3.79035e-49	2.75385e-48	669	669
C14orf109	0.527162	4.05914e-49	2.94383e-48	669	669
C17orf42	0.526994	4.40581e-49	3.1918e-48	669	669
TMCO4	0.526966	4.46543e-49	3.23382e-48	669	669
C21orf62	0.526926	4.55464e-49	3.29724e-48	669	669
CCL8	0.526806	4.82823e-49	3.49404e-48	669	621
HOXB6	0.526784	4.8821e-49	3.53175e-48	669	573
IL1A	0.526747	4.96936e-49	3.59359e-48	669	652
FRZB	0.526672	5.1551e-49	3.72522e-48	669	669
TRIB1	0.526607	5.32266e-49	3.84355e-48	669	669
VNN1	0.526498	5.61324e-49	4.05047e-48	669	664
VAMP3	0.526386	5.92714e-49	4.27238e-48	669	669
BCKDK	0.526127	6.72669e-49	4.84177e-48	669	669
ICMT	0.526068	6.92027e-49	4.97755e-48	669	669
SLC39A8	0.525565	8.84144e-49	6.33899e-48	669	669
LOC550643	0.525285	1.01301e-48	7.25001e-48	669	669
NAA20	0.525278	1.01657e-48	7.27289e-48	669	669
ACE	0.525052	1.13435e-48	8.10397e-48	669	669
HUS1	0.525021	1.15155e-48	8.22393e-48	669	669
POLD4	0.525001	1.16275e-48	8.301e-48	669	669
SF3A3	0.52495	1.19202e-48	8.50395e-48	669	669
COLEC12	0.524809	1.27644e-48	9.09653e-48	669	669
IQGAP3	0.524734	1.32352e-48	9.42868e-48	669	669
NEIL3	0.52472	1.33239e-48	9.48852e-48	669	652
GPR172A	0.524694	1.34925e-48	9.60519e-48	669	669
GALE	0.524574	1.42997e-48	1.01762e-47	669	669
CMAH	0.524553	1.44484e-48	1.02748e-47	669	669
LST1	0.524477	1.49911e-48	1.06569e-47	669	669
GAPDH	0.524381	1.57016e-48	1.11541e-47	669	669
TCEA3	0.524332	1.608e-48	1.14189e-47	669	669
DLL4	0.524266	1.66037e-48	1.17783e-47	669	669
SILV	0.524175	1.73541e-48	1.2302e-47	669	659
KHNYN	0.524	1.88851e-48	1.33731e-47	669	669
IGFBP5	0.523971	1.9151e-48	1.35471e-47	669	669
C10orf125	0.523939	1.94487e-48	1.37529e-47	669	669
SLC31A1	0.523914	1.96838e-48	1.39142e-47	669	669
KCNE4	0.523705	2.17759e-48	1.53769e-47	669	669
GIMAP4	0.523573	2.32088e-48	1.6383e-47	669	669
ACP5	0.523452	2.4613e-48	1.7362e-47	669	669
TMEM39A	0.523417	2.50248e-48	1.76463e-47	669	669
APOB48R	0.523345	2.59132e-48	1.826e-47	669	669
FCHSD1	0.523302	2.64527e-48	1.8627e-47	669	669
COPZ2	0.523253	2.70856e-48	1.90594e-47	669	669
GEMIN6	0.523136	2.86688e-48	2.01453e-47	669	669
FAM114A2	0.523091	2.92934e-48	2.0577e-47	669	669
SAMD9	0.523071	2.95803e-48	2.07713e-47	669	669
CYB561D2	0.523006	3.05145e-48	2.14198e-47	669	669
RABL5	0.52289	3.22795e-48	2.26508e-47	669	669
ADAMDEC1	0.522752	3.44955e-48	2.41889e-47	669	546
SLC29A1	0.522711	3.51725e-48	2.46465e-47	669	669
HOXD9	0.522706	3.52692e-48	2.47056e-47	669	541
YIPF2	0.522699	3.5381e-48	2.47753e-47	669	669
ARRDC3	0.522614	3.6865e-48	2.57875e-47	669	669
DPM1	0.522509	3.87733e-48	2.70942e-47	669	669
AURKB	0.522323	4.24064e-48	2.96021e-47	669	660
BTBD19	0.522258	4.3743e-48	3.05178e-47	669	668
HOXC11	0.522258	4.37485e-48	3.05178e-47	669	251
PMS2L2	0.522227	4.44123e-48	3.09701e-47	669	669
EPR1	0.522123	4.668e-48	3.25289e-47	669	665
PIK3R5	0.521954	5.06231e-48	3.52278e-47	669	669
XCL2	0.521836	5.3579e-48	3.72332e-47	669	398
DR1	0.521758	5.56369e-48	3.86366e-47	669	669
SLAIN2	0.521682	5.76978e-48	4.00126e-47	669	669
MEOX2	0.521543	6.16781e-48	4.27581e-47	669	656
TBXAS1	0.521504	6.28516e-48	4.35416e-47	669	669
CD300E	0.521366	6.71321e-48	4.6459e-47	669	257
EOMES	0.521358	6.73862e-48	4.66188e-47	669	566
LOC257358	0.521268	7.03537e-48	4.86551e-47	669	646
IAH1	0.521181	7.33493e-48	5.07093e-47	669	669
RUNX2	0.521114	7.5756e-48	5.23192e-47	669	669
SLC15A4	0.521018	7.93394e-48	5.47736e-47	669	669
SUMO1P3	0.521017	7.93643e-48	5.47736e-47	669	669
GPR4	0.520898	8.40234e-48	5.79494e-47	669	669
NEDD1	0.52067	9.36819e-48	6.45001e-47	669	669
TYMS	0.520669	9.37295e-48	6.45108e-47	669	669
LOC441294	0.520271	1.13411e-47	7.79235e-47	669	602
TROAP	0.520095	1.23328e-47	8.47082e-47	669	665
DHDDS	0.519925	1.33737e-47	9.17643e-47	669	669
HS3ST3B1	0.519898	1.35491e-47	9.28723e-47	669	602
BFAR	0.51974	1.46095e-47	1.00038e-46	669	669
C9orf89	0.519708	1.48316e-47	1.01525e-46	669	669
HJURP	0.519481	1.65276e-47	1.13019e-46	669	669
GABPB1	0.519422	1.70034e-47	1.16193e-46	669	669
FYB	0.519305	1.79779e-47	1.22769e-46	669	669
CENPN	0.519288	1.81184e-47	1.23645e-46	669	669
DDX20	0.519115	1.96756e-47	1.3409e-46	669	669
ECT2	0.519108	1.97387e-47	1.34475e-46	669	669
F2RL2	0.519003	2.07546e-47	1.413e-46	669	664
PLTP	0.518789	2.29811e-47	1.56353e-46	669	669
SEC22B	0.518751	2.3393e-47	1.59101e-46	669	669
LEF1	0.518672	2.42919e-47	1.65047e-46	669	669
MYH9	0.518655	2.44832e-47	1.66291e-46	669	669
CARD9	0.518533	2.59429e-47	1.76086e-46	669	669
PREB	0.518403	2.76006e-47	1.87211e-46	669	669
KCTD9	0.51832	2.87129e-47	1.94559e-46	669	669
WDR78	0.518158	3.10024e-47	2.09931e-46	669	669
TNIP1	0.5181	3.1863e-47	2.15686e-46	669	669
CKS2	0.518071	3.23151e-47	2.18673e-46	669	669
GATA3	0.51783	3.62256e-47	2.4497e-46	669	640
MRPL13	0.517632	3.9789e-47	2.68706e-46	669	669
B3GNT8	0.517585	4.06709e-47	2.74477e-46	669	667
C7orf28A	0.51753	4.17529e-47	2.8159e-46	669	669
PSMA1	0.517465	4.3061e-47	2.90315e-46	669	669
CENPE	0.517057	5.22239e-47	3.51384e-46	669	669
MCM5	0.517034	5.2782e-47	3.55021e-46	669	669
GNL2	0.516987	5.39747e-47	3.6268e-46	669	669
TAX1BP3	0.516922	5.56509e-47	3.73818e-46	669	669
UBASH3B	0.516891	5.64833e-47	3.7927e-46	669	669
SLA	0.51689	5.65002e-47	3.7927e-46	669	669
GSS	0.51679	5.92315e-47	3.97339e-46	669	669
MRPL32	0.516761	6.00629e-47	4.02513e-46	669	669
G6PC3	0.51666	6.29788e-47	4.21914e-46	669	669
IFT20	0.516646	6.34202e-47	4.24729e-46	669	669
FAM72B	0.516601	6.47523e-47	4.33507e-46	669	669
MAP3K6	0.516581	6.53729e-47	4.37463e-46	669	669
ULBP2	0.516578	6.54696e-47	4.37872e-46	669	668
PDRG1	0.516413	7.07571e-47	4.7292e-46	669	669
MFNG	0.516349	7.29464e-47	4.86906e-46	669	669
OVCA2	0.516329	7.36277e-47	4.91291e-46	669	669
CLEC11A	0.516322	7.38641e-47	4.92705e-46	669	669
IER5	0.516265	7.58797e-47	5.05815e-46	669	669
CLECL1	0.516244	7.66591e-47	5.10841e-46	669	634
SH2D1A	0.516062	8.3512e-47	5.55955e-46	669	636
SOD3	0.516053	8.38797e-47	5.58218e-46	669	669
PODXL	0.515768	9.59205e-47	6.38138e-46	669	669
PEX13	0.515741	9.71209e-47	6.4591e-46	669	669
SRPRB	0.515727	9.77887e-47	6.49922e-46	669	669
TTK	0.515619	1.02868e-46	6.82553e-46	669	666
RNF7	0.515562	1.05649e-46	7.00543e-46	669	669
APOL6	0.515546	1.06447e-46	7.05604e-46	669	669
PHEX	0.515499	1.08821e-46	7.21102e-46	669	660
WAS	0.515489	1.09334e-46	7.24262e-46	669	669
CHPF	0.515485	1.09565e-46	7.25553e-46	669	669
ADAM19	0.515272	1.2112e-46	8.01544e-46	669	669
ARHGAP11A	0.515238	1.23031e-46	8.13923e-46	669	669
C19orf55	0.51519	1.25876e-46	8.3247e-46	669	669
SC65	0.515048	1.34546e-46	8.88637e-46	669	669
LMAN1	0.515029	1.35747e-46	8.96275e-46	669	669
SSBP1	0.514967	1.39766e-46	9.21907e-46	669	669
DNAJC10	0.514957	1.40382e-46	9.25664e-46	669	669
C13orf33	0.514925	1.42521e-46	9.39157e-46	669	659
NUF2	0.514839	1.48429e-46	9.77447e-46	669	669
RAD54L	0.514809	1.50477e-46	9.9061e-46	669	669
GSG2	0.514789	1.51949e-46	9.9997e-46	669	668
CREM	0.514695	1.58745e-46	1.04333e-45	669	669
SMARCAL1	0.514676	1.6022e-46	1.05268e-45	669	669
OAS2	0.514574	1.68056e-46	1.10344e-45	669	669
BUD31	0.514572	1.6816e-46	1.10377e-45	669	669
SPN	0.514503	1.73697e-46	1.13937e-45	669	669
DPP9	0.514499	1.74032e-46	1.14119e-45	669	669
SPCS3	0.514473	1.76208e-46	1.15509e-45	669	669
ISL2	0.51428	1.92887e-46	1.26195e-45	669	578
COMMD7	0.514186	2.01535e-46	1.31767e-45	669	669
DNALI1	0.514092	2.10595e-46	1.37557e-45	669	669
TEX261	0.51409	2.10752e-46	1.37614e-45	669	669
STAC	0.514079	2.11829e-46	1.38273e-45	669	660
DERL3	0.513725	2.50082e-46	1.62979e-45	669	669
C2orf18	0.513581	2.67415e-46	1.74218e-45	669	669
APOBEC3H	0.513467	2.82027e-46	1.835e-45	669	623
HOTAIR	0.513373	2.94737e-46	1.91646e-45	669	270
FABP5	0.513352	2.97684e-46	1.93437e-45	669	668
DUSP14	0.513092	3.36064e-46	2.18024e-45	669	669
PLCG2	0.513073	3.38974e-46	2.19841e-45	669	669
RARRES3	0.51298	3.54082e-46	2.29492e-45	669	669
FCN3	0.512927	3.62895e-46	2.35052e-45	669	627
SIGLEC10	0.51291	3.65735e-46	2.36739e-45	669	669
TMEM67	0.512862	3.73967e-46	2.4199e-45	669	669
TRIP13	0.512819	3.81612e-46	2.46699e-45	669	669
FAM119B	0.512797	3.8549e-46	2.49046e-45	669	669
SRA1	0.512575	4.27624e-46	2.75735e-45	669	669
HNRNPF	0.512394	4.65195e-46	2.99769e-45	669	669
HSPB11	0.512208	5.07223e-46	3.26538e-45	669	669
S100Z	0.512195	5.10199e-46	3.28349e-45	669	647
GYS1	0.512134	5.25007e-46	3.37771e-45	669	669
NSMCE2	0.512109	5.31004e-46	3.4152e-45	669	669
GPR1	0.512013	5.55441e-46	3.57008e-45	669	508
MICA	0.511948	5.72477e-46	3.67723e-45	669	669
HMGCL	0.511804	6.11989e-46	3.92853e-45	669	669
MOBKL2A	0.511778	6.19391e-46	3.97477e-45	669	669
C9orf64	0.511723	6.35474e-46	4.07538e-45	669	669
PSMB2	0.511722	6.35716e-46	4.07563e-45	669	669
FAP	0.511592	6.75129e-46	4.32556e-45	669	666
ZDHHC4	0.51145	7.21382e-46	4.61896e-45	669	669
EVI2B	0.511356	7.53473e-46	4.8229e-45	669	669
TMEM188	0.511302	7.72429e-46	4.94266e-45	669	669
CLN5	0.511107	8.45716e-46	5.40646e-45	669	669
ALPK2	0.511044	8.70789e-46	5.56493e-45	669	642
BBS12	0.511043	8.71059e-46	5.56493e-45	669	669
ITGA7	0.510891	9.34543e-46	5.96483e-45	669	669
IFT52	0.510863	9.46953e-46	6.0402e-45	669	669
SLPI	0.510861	9.47625e-46	6.04257e-45	669	668
RCSD1	0.510855	9.50087e-46	6.05635e-45	669	669
TNFSF10	0.510821	9.65254e-46	6.15108e-45	669	669
SLC24A6	0.510802	9.73776e-46	6.1995e-45	669	669
UBC	0.510669	1.03592e-45	6.58889e-45	669	669
CDC25C	0.510651	1.04457e-45	6.64183e-45	669	664
UBASH3A	0.510401	1.17239e-45	7.4404e-45	669	476
THBS3	0.510356	1.19688e-45	7.59103e-45	669	669
MMRN1	0.510272	1.2446e-45	7.88875e-45	669	668
LMAN2L	0.510029	1.39216e-45	8.81292e-45	669	669
CCDC19	0.510017	1.40024e-45	8.86128e-45	669	628
SGOL2	0.509998	1.41259e-45	8.93663e-45	669	669
TFRC	0.509737	1.59286e-45	1.00739e-44	669	669
A2LD1	0.509734	1.59507e-45	1.00847e-44	669	669
MFSD5	0.509494	1.78213e-45	1.12497e-44	669	669
PGK1	0.509488	1.78693e-45	1.12765e-44	669	669
ZNF691	0.509462	1.80809e-45	1.14065e-44	669	669
NUMB	0.509458	1.81156e-45	1.14247e-44	669	669
CSF3R	0.509379	1.87871e-45	1.18445e-44	669	669
MTHFS	0.509339	1.91427e-45	1.2065e-44	669	669
GTSE1	0.509104	2.13298e-45	1.34307e-44	669	669
TMEM194A	0.509063	2.17331e-45	1.36804e-44	669	669
CCR3	0.509009	2.22742e-45	1.40123e-44	669	449
CEP135	0.508964	2.27402e-45	1.43009e-44	669	669
RAB13	0.508958	2.28083e-45	1.43348e-44	669	669
SGOL1	0.508936	2.30449e-45	1.4479e-44	669	664
RECQL	0.508883	2.36127e-45	1.48311e-44	669	669
NCAPG	0.508829	2.42024e-45	1.51872e-44	669	667
FLOT2	0.508801	2.45202e-45	1.53723e-44	669	669
SNAI2	0.508784	2.47101e-45	1.54865e-44	669	669
NOTCH3	0.508626	2.65643e-45	1.66331e-44	669	669
CCDC125	0.508613	2.67343e-45	1.67343e-44	669	669
C3AR1	0.508592	2.699e-45	1.68891e-44	669	669
IGFBP3	0.508531	2.77619e-45	1.73667e-44	669	669
CD99	0.508452	2.87782e-45	1.79969e-44	669	669
LRRFIP1	0.508372	2.98567e-45	1.8654e-44	669	669
GINS2	0.50781	3.86342e-45	2.40931e-44	669	669
PARVB	0.507552	4.34848e-45	2.70844e-44	669	669
UNC45A	0.50745	4.55726e-45	2.83761e-44	669	669
GINS1	0.507273	4.94116e-45	3.07569e-44	669	669
[truncated: 18,119 more rows]
